# Supplementary material for: Importance of vitamin D in acute and critically ill children with subgroup analyses of sepsis and respiratory tract infections: a systematic review and meta-analysis
Source: PubMed Central journal article supplement (PMC6538078; doi:10.1136/bmjopen-2018-027666), 2019-05-22

# Supplementary Material

## Table of Contents

|                                                                                                                                                   |    |
|---------------------------------------------------------------------------------------------------------------------------------------------------|----|
| Additional Table 1 PRISMA Checklist 2009 .....                                                                                                    | 3  |
| Additional Table 2A Search terms used in OVID .....                                                                                               | 5  |
| Additional Table 2B Search terms used in PubMed .....                                                                                             | 6  |
| Additional Table 3A Newcastle Ottawa study quality scoring system (cohort studies) .....                                                          | 7  |
| Additional Table 3B Newcastle Ottawa study quality scoring system (case-control studies) .....                                                    | 8  |
| Additional Table 3C Newcastle Ottawa study quality scoring system (cross-sectional studies) .....                                                 | 9  |
| Additional Table 4A Circulating 25(OH)D threshold levels used in the selected studies .....                                                       | 10 |
| Additional Table 4B Circulating 25(OH)D threshold levels used in the selected studies for prevalence in sepsis .....                              | 13 |
| Additional Table 5 Studies with thresholds other than < 50 nmol/L .....                                                                           | 14 |
| Additional Table 6 Excluded studies .....                                                                                                         | 15 |
| Additional Table 7 Characteristics of the 52 included studies .....                                                                               | 16 |
| Additional Table 8 Objectives and outcomes of included studies .....                                                                              | 22 |
| Additional Table 9 Assay used in each study to measure Vitamin D levels .....                                                                     | 26 |
| Additional Table 10 Funding and ethical approval of included studies .....                                                                        | 27 |
| Additional Table 11 Age groups of children in each study .....                                                                                    | 30 |
| Additional Table 12 Prevalence of vitamin D deficiency in each study of acute and critically ill children (sorted from highest to lowest) .....   | 31 |
| Additional Table 13 Characteristics of studies used in the meta-analysis of prevalence .....                                                      | 33 |
| Additional Table 14 Sensitivity analyses for prevalence of vitamin D deficiency in acute and critically ill children .....                        | 35 |
| Additional Table 15 Multivariate meta-regression model for prevalence .....                                                                       | 36 |
| Additional Table 16 Characteristics of studies included in the meta-analysis for prevalence in individuals with sepsis .....                      | 37 |
| Additional Table 17 Sensitivity analyses for prevalence of vitamin D deficiency in acute and critically ill children with sepsis .....            | 38 |
| Additional Table 18 Sensitivity analyses for mortality. Pooled odds ratios for risk of mortality in deficient versus not deficient children ..... | 39 |
| Additional Figures .....                                                                                                                          | 40 |

|                                                                                                                                                                                                 |    |
|-------------------------------------------------------------------------------------------------------------------------------------------------------------------------------------------------|----|
| Additional Figure 1 Funnel plot of studies of prevalence of vitamin D deficiency in acute and critically ill children. ....                                                                     | 40 |
| Additional Figure 2. Pooled prevalence estimate for vitamin D deficiency in acute and critically ill children (by country group). ....                                                          | 41 |
| Additional Figure 3. Pooled prevalence estimates for vitamin D deficiency in acute and critically ill children (neonates versus all other age groups). ....                                     | 42 |
| Additional Figure 4 Bubble plots of univariate meta-regressions. ....                                                                                                                           | 43 |
| Additional Figure 5 Funnel plot for prevalence of vitamin D deficiency in acute and critically ill children with sepsis. ....                                                                   | 44 |
| Additional Figure 6 Pooled prevalence estimate for vitamin D deficiency in acute and critically ill children with sepsis (subgroup analysis by study design). ....                              | 45 |
| Additional Figure 7 Funnel plot of risk of mortality in vitamin D deficient versus vitamin D non-deficient acute and critically ill children. ....                                              | 46 |
| Additional Figure 8 Pooled odds ratio (OR) and 95% CI for risk of mortality in vitamin D deficient versus vitamin D non-deficient acute and critically ill children (fixed effects model). .... | 47 |

| <b>Additional Table 1 PRISMA Checklist 2009</b> |          |                                                                                                                                                                                                                                                                                                             |                              |
|-------------------------------------------------|----------|-------------------------------------------------------------------------------------------------------------------------------------------------------------------------------------------------------------------------------------------------------------------------------------------------------------|------------------------------|
| <b>Section/topic</b>                            | <b>#</b> | <b>Checklist item</b>                                                                                                                                                                                                                                                                                       | <b>Reported on page #</b>    |
| <b>TITLE</b>                                    |          |                                                                                                                                                                                                                                                                                                             |                              |
| Title                                           | 1        | Identify the report as a systematic review, meta-analysis, or both.                                                                                                                                                                                                                                         | 1                            |
| <b>ABSTRACT</b>                                 |          |                                                                                                                                                                                                                                                                                                             |                              |
| Structured summary                              | 2        | Provide a structured summary including, as applicable: background; objectives; data sources; study eligibility criteria, participants, and interventions; study appraisal and synthesis methods; results; limitations; conclusions and implications of key findings; systematic review registration number. | 2-3                          |
| <b>INTRODUCTION</b>                             |          |                                                                                                                                                                                                                                                                                                             |                              |
| Rationale                                       | 3        | Describe the rationale for the review in the context of what is already known.                                                                                                                                                                                                                              | 4-5                          |
| Objectives                                      | 4        | Provide an explicit statement of questions being addressed with reference to participants, interventions, comparisons, outcomes, and study design (PICOS).                                                                                                                                                  | 6-8                          |
| <b>METHODS</b>                                  |          |                                                                                                                                                                                                                                                                                                             |                              |
| Protocol and registration                       | 5        | Indicate if a review protocol exists, if and where it can be accessed (e.g., Web address), and, if available, provide registration information including registration number.                                                                                                                               | 9                            |
| Eligibility criteria                            | 6        | Specify study characteristics (e.g., PICOS, length of follow-up) and report characteristics (e.g., years considered, language, publication status) used as criteria for eligibility, giving rationale.                                                                                                      | 5-7                          |
| Information sources                             | 7        | Describe all information sources (e.g., databases with dates of coverage, contact with study authors to identify additional studies) in the search and date last searched.                                                                                                                                  | 6-7                          |
| Search                                          | 8        | Present full electronic search strategy for at least one database, including any limits used, such that it could be repeated.                                                                                                                                                                               | 6 and supplementary material |
| Study selection                                 | 9        | State the process for selecting studies (i.e., screening, eligibility, included in systematic review, and, if applicable, included in the meta-analysis).                                                                                                                                                   | 6-7                          |
| Data collection process                         | 10       | Describe method of data extraction from reports (e.g., piloted forms, independently, in duplicate) and any processes for obtaining and confirming data from investigators.                                                                                                                                  | 7                            |
| Data items                                      | 11       | List and define all variables for which data were sought (e.g., PICOS, funding sources) and any assumptions and simplifications made.                                                                                                                                                                       | 7-8                          |
| Risk of bias in individual studies              | 12       | Describe methods used for assessing risk of bias of individual studies (including specification of whether this was done at the study or outcome level), and how this information is to be used in any data synthesis.                                                                                      | 8                            |
| Summary measures                                | 13       | State the principal summary measures (e.g., risk ratio, difference in means).                                                                                                                                                                                                                               | 8                            |
| Synthesis of results                            | 14       | Describe the methods of handling data and combining results of studies, if done, including measures of consistency (e.g., I <sup>2</sup> ) for each meta-analysis.                                                                                                                                          | 8-10                         |

**Additional Table 1 PRISMA Checklist 2009**

| Section/topic                 | #  | Checklist item                                                                                                                                                                                           | Reported on page #                        |
|-------------------------------|----|----------------------------------------------------------------------------------------------------------------------------------------------------------------------------------------------------------|-------------------------------------------|
| Risk of bias across studies   | 15 | Specify any assessment of risk of bias that may affect the cumulative evidence (e.g., publication bias, selective reporting within studies).                                                             | 8                                         |
| Additional analyses           | 16 | Describe methods of additional analyses (e.g., sensitivity or subgroup analyses, meta-regression), if done, indicating which were pre-specified.                                                         | 9-10 and 15                               |
| <b>RESULTS</b>                |    |                                                                                                                                                                                                          |                                           |
| Study selection               | 17 | Give numbers of studies screened, assessed for eligibility, and included in the review, with reasons for exclusions at each stage, ideally with a flow diagram.                                          | 10                                        |
| Study characteristics         | 18 | For each study, present characteristics for which data were extracted (e.g., study size, PICOS, follow-up period) and provide the citations.                                                             | 14-19 (supplementary material)            |
| Risk of bias within studies   | 19 | Present data on risk of bias of each study and, if available, any outcome level assessment (see item 12).                                                                                                | 5-7 (supplementary material)              |
| Results of individual studies | 20 | For all outcomes considered (benefits or harms), present, for each study: (a) simple summary data for each intervention group (b) effect estimates and confidence intervals, ideally with a forest plot. | 13,15,18 and supplementary material       |
| Synthesis of results          | 21 | Present results of each meta-analysis done, including confidence intervals and measures of consistency.                                                                                                  | 13 and supplementary material pages 32-36 |
| Risk of bias across studies   | 22 | Present results of any assessment of risk of bias across studies (see Item 15).                                                                                                                          | 5-7 (supplementary material)              |
| Additional analysis           | 23 | Give results of additional analyses, if done (e.g., sensitivity or subgroup analyses, meta-regression [see Item 16]).                                                                                    | supplementary material pages 32-36        |
| <b>DISCUSSION</b>             |    |                                                                                                                                                                                                          |                                           |
| Summary of evidence           | 24 | Summarize the main findings including the strength of evidence for each main outcome; consider their relevance to key groups (e.g., healthcare providers, users, and policy makers).                     | 19-21                                     |
| Limitations                   | 25 | Discuss limitations at study and outcome level (e.g., risk of bias), and at review-level (e.g., incomplete retrieval of identified research, reporting bias).                                            | 20-22                                     |
| Conclusions                   | 26 | Provide a general interpretation of the results in the context of other evidence, and implications for future research.                                                                                  | 22                                        |
| <b>FUNDING</b>                |    |                                                                                                                                                                                                          |                                           |
| Funding                       | 27 | Describe sources of funding for the systematic review and other support (e.g., supply of data); role of funders for the systematic review.                                                               | 22                                        |

From: Moher D, Liberati A, Tetzlaff J, Altman DG, The PRISMA Group (2009). Preferred Reporting Items for Systematic Reviews and Meta-Analyses: The PRISMA Statement. PLoS Med 6(6): e1000097. doi:10.1371/journal.pmed1000097 For more information, visit: [www.prisma-statement.org](http://www.prisma-statement.org).

---

**Additional Table 2A Search terms used in OVID**

---

1. Vitamin D
  2. Sepsis or septic shock
  3. Vitamin D or cholecalciferol\* or ergocalciferol or 25-hydroxyvitamin D or calcidiol or calcitriol
  4. Intensive care unit\* or critical care
  5. Multiple organ dysfunction syndrome or multiple organ failure
  6. (1 and 2) or 5
  7. ((1 or 3) and 2 or 4
  8. (1 or 3) and 2
  9. (1 or 3) and 4
  10. (1 or 3) and 5
  11. Sepsis
  12. multi\* organ dysfunction syndrome or multiple organ failure
  13. multi\* organ dysfunction syndrome or multi\* organ failure
  14. (2 or 8) and 3
  15. critical\* ill or acute condition\* or intensive care unit
  16. child\* or pediatric\*
  17. vitamin D or cholecalciferol or ergocalciferol or 25-hydroxyvitamin D or calcidiol or calcitriol
  18. 15 and 16 and 17
  19. Vitamin D blood levels or 25-hydroxyvitamin
  20. 5 and 3 and 15 and 16
  21. 2 and 15 and 16 and 17
  22. 16 and 2
  23. 16 and 2 and 3
  24. Pediatric\*
  25. Pediatric\* and 5 and 2
  26. 24 and 3 and 15
-

---

**Additional Table 2B Search terms used in PubMed**

---

**Term searched**

---

1. Vitamin D.mp.
  2. (sepsis or septic shock).mp.
  3. (vitamin D or cholecalciferol\* or ergocalciferol or 25-hydroxyvitamin D or calcidiol or calcitriol).mp.
  4. (intensive care unit\* or critical care).mp.
  5. (multi\* organ dysfunction syndrome or multiple organ failure).mp.
  6. (critical\* ill or acute condition\* or intensive care unit).mp.
  7. (toddler or infant or child\* or neonate\* or baby or teenager or pediatric\* or paediatric\*).mp.
  8. 3 and 6 and 2 and 7
-

**Additional Table 3A Newcastle Ottawa study quality scoring system (cohort studies)**

| Study                       | Selection                                             |                                           |                              |                                                                                           | Comparability<br>Comparability of cohorts<br>on the basis of the design or<br>analysis (maximum 2 stars) | Outcome                  |                                                                                                   |                                        | Number<br>of stars<br>(out of 9<br>total) |
|-----------------------------|-------------------------------------------------------|-------------------------------------------|------------------------------|-------------------------------------------------------------------------------------------|----------------------------------------------------------------------------------------------------------|--------------------------|---------------------------------------------------------------------------------------------------|----------------------------------------|-------------------------------------------|
|                             | Represent<br>ativeness<br>of the<br>exposed<br>cohort | Selection of the<br>non-exposed<br>cohort | Ascertainment<br>of exposure | Demonstration that<br>outcome of interest was<br>not present at the start<br>of the study |                                                                                                          | Assessment of<br>outcome | Was follow-up long<br>enough for outcome<br>to occur (≥ 28 days<br>after admission to the<br>ICU) | Adequacy of<br>follow up of<br>cohorts |                                           |
| Ebenezer 2016               | 1                                                     | 1                                         | 1                            | 1                                                                                         | 0                                                                                                        | 1                        | 0                                                                                                 | 1                                      | 6                                         |
| Sankar 2016                 | 1                                                     | 1                                         | 1                            | 1                                                                                         | 2                                                                                                        | 1                        | 0                                                                                                 | 1                                      | 8                                         |
| Rippel 2012                 | 1                                                     | 1                                         | 1                            | 1                                                                                         | 1                                                                                                        | 1                        | 1                                                                                                 | 1                                      | 8                                         |
| Madden 2012                 | 1                                                     | 1                                         | 1                            | 1                                                                                         | 2                                                                                                        | 1                        | 0                                                                                                 | 1                                      | 8                                         |
| McNally 2012                | 1                                                     | 1                                         | 1                            | 0                                                                                         | 1                                                                                                        | 1                        | 1                                                                                                 | 1                                      | 7                                         |
| Dayal 2014                  | 1                                                     | 1                                         | 1                            | 1                                                                                         | 0                                                                                                        | 1                        | 0                                                                                                 | 1                                      | 6                                         |
| Ayulo 2014                  | 1                                                     | 1                                         | 1                            | 1                                                                                         | 2                                                                                                        | 1                        | 0                                                                                                 | 0                                      | 7                                         |
| Bustos 2016                 | 1                                                     | 1                                         | 1                            | 0                                                                                         | 2                                                                                                        | 1                        | 0                                                                                                 | 1                                      | 7                                         |
| Prasad 2015                 | 1                                                     | 1                                         | 1                            | 0                                                                                         | 2                                                                                                        | 1                        | 0                                                                                                 | 1                                      | 7                                         |
| Onwuneme 2015 (2)           | 1                                                     | 1                                         | 1                            | 1                                                                                         | 2                                                                                                        | 1                        | 0                                                                                                 | 1                                      | 8                                         |
| Inamo 2011                  | 1                                                     | 1                                         | 1                            | 0                                                                                         | 1                                                                                                        | 1                        | 0                                                                                                 | 1                                      | 6                                         |
| Shah 2016                   | 1                                                     | 1                                         | 1                            | 1                                                                                         | 0                                                                                                        | 1                        | 0                                                                                                 | 1                                      | 6                                         |
| Lopez 2016                  | 1                                                     | 1                                         | 1                            | 1                                                                                         | 2                                                                                                        | 1                        | 0                                                                                                 | 1                                      | 8                                         |
| Garcia-Soler 2017           | 1                                                     | 1                                         | 1                            | 1                                                                                         | 2                                                                                                        | 1                        | 0                                                                                                 | 0                                      | 7                                         |
| Sankar 2017                 | 1                                                     | 1                                         | 1                            | 1                                                                                         | 2                                                                                                        | 1                        | 0                                                                                                 | 1                                      | 8                                         |
| Asilioglu 2017              | 1                                                     | 1                                         | 1                            | 1                                                                                         | 1                                                                                                        | 1                        | 0                                                                                                 | 1                                      | 7                                         |
| Halwany 2017                | 1                                                     | 1                                         | 1                            | 1                                                                                         | 1                                                                                                        | 1                        | 0                                                                                                 | 0                                      | 6                                         |
| Hurwitz 2017                | 1                                                     | 1                                         | 1                            | 0                                                                                         | 1                                                                                                        | 1                        | 0                                                                                                 | 1                                      | 6                                         |
| Banajeh 2009                | 1                                                     | 1                                         | 1                            | 0                                                                                         | 1                                                                                                        | 1                        | 1                                                                                                 | 1                                      | 7                                         |
| Badawi 2017                 | 1                                                     | 1                                         | 1                            | 1                                                                                         | 1                                                                                                        | 1                        | 1                                                                                                 | 1                                      | 8                                         |
| Rey 2014                    | 1                                                     | 1                                         | 1                            | 1                                                                                         | 2                                                                                                        | 0                        | 0                                                                                                 | 1                                      | 7                                         |
| Ponnarmani 2016             | 1                                                     | 0                                         | 1                            | 1                                                                                         | 1                                                                                                        | 1                        | 0                                                                                                 | 1                                      | 6                                         |
| Onwuneme 2015 (1)           | 1                                                     | 1                                         | 1                            | 1                                                                                         | 1                                                                                                        | 1                        | 0                                                                                                 | 1                                      | 8                                         |
| El-Gamasy 2017              | 1                                                     | 0                                         | 1                            | 1                                                                                         | 2                                                                                                        | 1                        | 0                                                                                                 | 1                                      | 7                                         |
| Dhandai 2018                | 1                                                     | 1                                         | 1                            | 1                                                                                         | 1                                                                                                        | 1                        | 0                                                                                                 | 1                                      | 7                                         |
| Hebbar 2014                 | 1                                                     | 0                                         | 1                            | 1                                                                                         | 1                                                                                                        | 1                        | 0                                                                                                 | 1                                      | 6                                         |
| Korwutthikulrangsri<br>2015 | 1                                                     | 1                                         | 1                            | 1                                                                                         | 2                                                                                                        | 1                        | 0                                                                                                 | 0                                      | 7                                         |
| Elmoneim 2016               | 1                                                     | 1                                         | 1                            | 1                                                                                         | 0                                                                                                        | 1                        | 0                                                                                                 | 1                                      | 7                                         |
| Vo 2018                     | 1                                                     | 1                                         | 1                            | 1                                                                                         | 2                                                                                                        | 1                        | 0                                                                                                 | 1                                      | 8                                         |
| Mathias 2017                | 1                                                     | 1                                         | 1                            | 1                                                                                         | 0                                                                                                        | 1                        | 0                                                                                                 | 1                                      | 6                                         |

The Newcastle-Ottawa Scale (NOS) for assessing the quality of non-randomised studies in meta-analyses. Available at: [http://www.ohri.ca/programs/clinical\\_epidemiology/oxford.asp](http://www.ohri.ca/programs/clinical_epidemiology/oxford.asp).

**Additional Table 3B Newcastle Ottawa study quality scoring system (case-control studies)**

| Study             | SELECTION                        |                                 |                       |                        | COMPARABILITY                                                                                | EXPOSURE                  |                                                                                         |                   | Number of stars<br>(out of 9 total) |
|-------------------|----------------------------------|---------------------------------|-----------------------|------------------------|----------------------------------------------------------------------------------------------|---------------------------|-----------------------------------------------------------------------------------------|-------------------|-------------------------------------|
|                   | Is the case definition adequate? | Representativeness of the cases | Selection of controls | Definition of controls | Comparability of cases and controls on the basis of the design or analysis (maximum 2 stars) | Ascertainment of exposure | Same method of ascertainment for cases and controls (yes or no or 0 star if no mention) | Non-response rate |                                     |
| Wayse 2004        | 1                                | 1                               | 0                     | 0                      | 1                                                                                            | 1                         | 1                                                                                       | 1                 | 6                                   |
| Karatekin 2009    | 1                                | 1                               | 0                     | 0                      | 1                                                                                            | 1                         | 1                                                                                       | 1                 | 6                                   |
| Roth 2009         | 1                                | 1                               | 0                     | 1                      | 1                                                                                            | 1                         | 1                                                                                       | 0                 | 7                                   |
| Roth 2010         | 1                                | 1                               | 1                     | 1                      | 2                                                                                            | 1                         | 1                                                                                       | 0                 | 8                                   |
| Cetinkaya 2015    | 1                                | 1                               | 0                     | 0                      | 0                                                                                            | 1                         | 1                                                                                       | 1                 | 6                                   |
| Cizmeci 2015      | 1                                | 1                               | 0                     | 0                      | 2                                                                                            | 1                         | 1                                                                                       | 1                 | 7                                   |
| Narang 2016       | 1                                | 1                               | 0                     | 0                      | 1                                                                                            | 1                         | 1                                                                                       | 1                 | 6                                   |
| Dinlen 2016       | 1                                | 1                               | 0                     | 0                      | 1                                                                                            | 1                         | 1                                                                                       | 1                 | 6                                   |
| Ahmed 2015        | 1                                | 1                               | 0                     | 1                      | 2                                                                                            | 1                         | 1                                                                                       | 1                 | 8                                   |
| Cayir 2014        | 1                                | 1                               | 0                     | 0                      | 2                                                                                            | 1                         | 1                                                                                       | 1                 | 7                                   |
| Say 2017          | 1                                | 1                               | 0                     | 0                      | 2                                                                                            | 1                         | 1                                                                                       | 0                 | 6                                   |
| Basha 2014        | 1                                | 1                               | 0                     | 1                      | 2                                                                                            | 1                         | 1                                                                                       | 0                 | 7                                   |
| Jia 2017          | 1                                | 1                               | 0                     | 1                      | 1                                                                                            | 1                         | 1                                                                                       | 1                 | 7                                   |
| Jat 2016          | 1                                | 1                               | 0                     | 1                      | 2                                                                                            | 1                         | 1                                                                                       | 1                 | 8                                   |
| Moreno-Solis 2015 | 1                                | 1                               | 0                     | 1                      | 1                                                                                            | 1                         | 0                                                                                       | 1                 | 6                                   |
| Sakka 2014        | 1                                | 1                               | 0                     | 1                      | 2                                                                                            | 1                         | 1                                                                                       | 1                 | 8                                   |
| Khakshour 2015    | 1                                | 1                               | 0                     | 0                      | 1                                                                                            | 1                         | 1                                                                                       | 0                 | 5                                   |
| Li 2018           | 1                                | 1                               | 1                     | 1                      | 2                                                                                            | 1                         | 1                                                                                       | 0                 | 8                                   |

The Newcastle-Ottawa Scale (NOS) for assessing the quality of non-randomised studies in meta-analyses. Available at: [http://www.ohri.ca/programs/clinical\\_epidemiology/oxford.asp](http://www.ohri.ca/programs/clinical_epidemiology/oxford.asp).



**Additional Table 3C Newcastle Ottawa study quality scoring system (cross-sectional studies)**

| Study         | SELECTION (Maximum 5 stars)      |             |                 |                                             | COMPARABILITY (Maximum 2 stars)                                                                                                 | OUTCOME (Maximum 3 stars)               |                               | Number of stars (out of 10 total) |
|---------------|----------------------------------|-------------|-----------------|---------------------------------------------|---------------------------------------------------------------------------------------------------------------------------------|-----------------------------------------|-------------------------------|-----------------------------------|
|               | Representativeness of the sample | Sample size | Non-respondents | Ascertainment of the exposure (risk factor) | Subjects in different outcome groups are comparable, based on the study design or analysis. Confounding factors are controlled. | Assessment of the outcome (max=2 stars) | Statistical test (max=1 star) |                                   |
| Yaghmaie 2017 | 1                                | 0           | 0               | 0                                           | 1                                                                                                                               | 1                                       | 1                             | 4                                 |
| Alvarez 2016  | 1                                | 0           | 0               | 1                                           | 1                                                                                                                               | 2                                       | 1                             | 6                                 |
| Alonso 2015   | 1                                | 0           | 0               | 1                                           | 1                                                                                                                               | 1                                       | 1                             | 5                                 |
| Binks 2014    | 1                                | 0           | 0               | 1                                           | 1                                                                                                                               | 2                                       | 1                             | 6                                 |

The Newcastle-Ottawa Scale (NOS) for assessing the quality of non-randomised studies in meta-analyses. Available at:

[http://www.ohri.ca/programs/clinical\\_epidemiology/oxford.asp](http://www.ohri.ca/programs/clinical_epidemiology/oxford.asp).

**Additional Table 4A Circulating 25(OH)D threshold levels used in the selected studies**

| Study             | Number of cases | 25(OH)D categories (as given)                | Number of cases in each category |
|-------------------|-----------------|----------------------------------------------|----------------------------------|
| Asililoglu 2017   | 250             | Deficiency: <20 ng/mL                        | 120                              |
|                   |                 | Sufficiency: ≥20 ng/mL                       | 85                               |
| Halwany 2017      | 102             | Deficiency: <20 ng/ml                        | 38                               |
|                   |                 | Insufficiency: 20-29.9 ng/ml                 | 39                               |
|                   |                 | “Normal” levels: 30 ng/ml                    | 25                               |
| Hurwitz 2017      | 90              | Deficiency: <20 ng/mL                        | 11                               |
| Garcia-Soler 2017 | 340             | Deficiency: <20 ng/mL                        | 149                              |
|                   |                 | Insufficiency: 20-30 ng/mL                   | 128                              |
|                   |                 | 25(OH)D levels: 30-40 ng/mL                  | 41                               |
|                   |                 | Optimal levels >40 ng/mL                     | 22                               |
| Badawi 2017       | 88              | Deficiency: < 50nmol/l                       | 39                               |
|                   |                 | Severe deficiency: <30 nmol/l                | 30                               |
| Jia 2017          | 110             | Severe deficiency: <10 ng/ml                 | 36                               |
|                   |                 | Deficiency: 10-20 ng/ml                      | 56                               |
|                   |                 | Insufficiency: 21-30 ng/ml                   | 17                               |
|                   |                 | Sufficiency: >30 ng/ml                       | 1                                |
| Yaghmaie 2017     | 82              | Deficiency: <30 ng/ml                        | 53                               |
|                   |                 | Sufficiency: ≥30 ng/ml                       | 29                               |
| Say 2017          | 100             | Severe deficiency (group 1) <5 ng/mL         | 63                               |
|                   |                 | Insufficiency (group2): 5 to 15 ng/mL        | 24                               |
|                   |                 | Sufficiency (group 3) ≥15 ng/mL              | 13                               |
| El-Gamasy 2017    | 80              | Serious deficiency: < 30 nmol/L              | 26                               |
|                   |                 | Insufficiency: 30-75 nmol/L                  | 27                               |
|                   |                 | Adequate levels >75 nmol/L                   | 27                               |
| Sankar 2017       | 43              | Severe deficiency: serum 25 (OH) D <10 ng/mL | 31                               |
| Shah 2016         | 154             | 25(OH)D < 20 ng/mL                           | 128                              |
|                   |                 | 25(OH)D ≥20 ng/mL                            | 26                               |
| Ponnarmani 2016   | 124             | Deficiency: < 50nmol/L                       | 63                               |
|                   |                 | Insufficiency: 50-75 nmol/L                  | 31                               |
|                   |                 | <75, insufficient and deficient              | 94                               |
|                   |                 | Sufficiency: >75 nmol/L                      | 30                               |
| Sankar 2016       | 101             | Deficiency: ≤ 20 ng/mL                       | 75                               |
|                   |                 | Severe deficiency: <15 ng/mL                 | 62                               |
|                   |                 | ‘No deficiency’: > 20 ng/mL                  | 26                               |
| Bustos 2016       | 90              | Deficiency: <20 ng/ml                        | 39                               |
| Ebenezer 2016     | 52              | Normal levels: >20 ng/ml                     | 51                               |
|                   |                 | Deficiency: < 20ng/mL                        | 21                               |
|                   |                 | Insufficiency: 20–30 ng/ml                   | 12                               |
| Elmoneim 2016     | 21              | ‘Normal levels: ≥ 20 ng/L                    | 31                               |
|                   |                 | Deficiency: < 20 ng/mL                       | 17                               |
|                   |                 | Insufficiency: 20-30 ng/mL                   | 4                                |
| Jat 2016          | 50              | Normal levels: > 30 ng/mL                    | 9                                |
|                   |                 | Deficiency: <20 ng/ml                        | 42                               |
|                   |                 | Insufficiency: 20-30 ng/ml                   | 2                                |
| Narang 2016       | 50              | Sufficiency: ≥30 ng/ml                       | 1                                |
|                   |                 | “Severe deficiency”: <20ng/ml                | 28                               |
| Dinlen 2016       | 30              | Deficiency: ≤15 ng/mL                        | 26                               |
|                   |                 | Severe deficiency: ≤5 ng/mL                  | 3                                |
| Lopez 2016        | 347             | 25-OHD levels: <10 ng/mL                     | 19                               |
|                   |                 | 25-OHD levels: 10-20 ng/mL                   | 65                               |
|                   |                 | 25-OHD levels: 20-30 ng/mL                   | 134                              |
| Alvarez 2016      | 50              | 25(OH) D levels: <20 ng/mL                   | 29                               |
|                   |                 | 25(OH) D levels: 20-30 ng/mL                 | 37                               |
| Onwuneme 2015 (1) | 120             | 25(OH)D levels: <50nmol/L                    | 71                               |
|                   |                 | 25(OH)D levels: ≥50nmol/L                    | 49                               |
| Onwuneme 2015 (2) | 94              | 25(OH)D levels: <20 ng/mL                    | 86                               |
|                   |                 | 25(OH)D levels: < 30 nmol/L                  | 60                               |
|                   |                 | 25(OH)D levels: ≥30 nmol/L                   | 34                               |
| Prasad 2015       | 80              | Deficiency: < 20 ng/ml                       | 67                               |
|                   |                 | Sufficiency: ≥ 20 ng/mL                      | 13                               |
| Moreno-Solis 2015 | 48              | Deficiency: <20 ng/ml                        | 9                                |
|                   |                 | Insufficiency: 21–29 ng/ml                   | 16                               |
|                   |                 | Sufficiency: ≥30 ng/ml                       | 23                               |

|                          |     |                                             |     |
|--------------------------|-----|---------------------------------------------|-----|
| Alonso 2015              | 288 | Deficiency: <20 ng/ml                       | 45  |
|                          |     | <10 ng/ml                                   | 6   |
| Korwutthikulrangsri 2015 | 32  | Deficiency: < 20 ng/ml                      | 25  |
|                          |     | Insufficiency: 20-29.9 ng/ml                | 7   |
|                          |     | Sufficiency: $\geq$ 30 ng/mL                | 0   |
| Khakshour 2015           | 37  | Deficiency: <20 ng/mL                       | 9   |
| Cizmeci 2015             | 40  | Deficiency: $\leq$ 20 ng/ml                 | 28  |
|                          |     | Insufficiency: 21–29 ng/ml                  | 7   |
|                          |     | Normal levels: $\geq$ 30 ng/ml              | 5   |
| Cetinkaya 2015           | 50  | Severe deficiency: <10 ng ml <sup>-1</sup>  | 42  |
|                          |     | Insufficiency: 11 to 32 ng ml <sup>-1</sup> | 8   |
| Ayulo 2014               | 216 | Deficient: < 15 ng/ml                       | 61  |
|                          |     | Insufficient: 15-29 ng/mL                   | 102 |
|                          |     | Sufficient: $\geq$ 30 ng/mL                 | 53  |
| Dayal 2014               | 92  | Deficiency: < 50 nmol/L                     | 23  |
|                          |     | Insufficiency: 50–75 nmol/L                 | 41  |
|                          |     | Sufficiency: > 75 nmol/L                    | 28  |
|                          |     | 25(OH) D levels: < 75 nmol/L                | 64  |
|                          |     | 'Non-deficiency': > 50 nmol/L               | 69  |
| Hebbar 2014              | 61  | Deficiency: $\leq$ 10 ng/mL                 | 10  |
|                          |     | Insufficiency: 10 to 20 ng/mL               | 27  |
|                          |     | Sufficiency: $\geq$ 20 ng/mL                | 24  |
| Rey 2014                 | 156 | Deficiency: < 20 ng/mL                      | 46  |
|                          |     | 25(OH)D levels: $\geq$ 20 ng/mL             | 110 |
| Ahmed 2014               | 50  | Deficiency: <50 nmol/L                      | 15  |
| Basha 2014               | 81  | Deficiency: <50 nmol/L                      | 53  |
|                          |     | Insufficiency: <75 nmol/L                   | 14  |
|                          |     | Normal level: >75 nmol/L                    | 14  |
| Sakka 2014               | 96  | Severe deficiency: 0–5 ng/mL                | 29  |
|                          |     | Deficiency: 5–15 ng/mL                      | 49  |
|                          |     | Insufficiency: 15–20 ng/mL                  | 11  |
|                          |     | Sufficiency: 20–100 ng/mL                   | 7   |
| Cayir 2014               | 88  | Normal levels: 20 ng/mL                     | 38  |
|                          |     | Insufficiency: 15-20ng/mL                   | 18  |
|                          |     | Deficiency: <15ng/mL                        | 32  |
| Binks 2014               | 74  | 25(OH) D levels: < 50 nmol/L                | 11  |
| Madden 2012              | 511 | 25(OH) D levels: < 10 ng/mL                 | 36  |
|                          |     | 25(OH) D levels: 10-19.9 ng/mL              | 169 |
|                          |     | Deficiency: < 20 ng/ml                      | 205 |
|                          |     | Insufficiency: <30 ng/mL                    | 364 |
| Rippel 2012              | 316 | Deficiency: < 50 nmol/L                     | 109 |
|                          |     | 'Normal levels': $\geq$ 50 nmol/L           | 207 |
| Madden 2012              | 511 | 25(OH)D levels: < 10 ng/mL                  | 36  |
|                          |     | 25(OH)D levels: 10-19.9 ng/mL               | 169 |
|                          |     | Deficiency: < 20 ng/mL                      | 205 |
|                          |     | Insufficiency: <30 ng/mL                    | 364 |
| McNally 2012             | 326 | Deficiency: < 50 nmol/L                     | 225 |
|                          |     | 25(OH)D levels: 50 to 75 nmol/L             | 75  |
|                          |     | 'Not deficient': > 50 nmol/L                | 101 |
| Inamo 2011               | 28  | 25(OH)D levels: < 10 ng/mL                  | 4   |
|                          |     | 25(OH)D levels: < 15 ng/mL                  | 8   |
|                          |     | 25(OH)D levels: < 25 ng/mL                  | 12  |
|                          |     | 25(OH)D levels: < 40 ng/mL                  | 28  |
| Roth 2010                | 25  | 25(OH)D levels: < 40 nmol/L                 | 21  |
| Banajeh 2009             | 79  | Deficiency: <30 nmol/L                      | 29  |
| Karatekin 2009           | 25  | Serum 25(OH)D <10 (deficiency)              | 19  |
|                          |     | Serum 25(OH)D 11 to 20 (deficiency)         | 4   |
|                          |     | Serum 25(OH)D 21 to 32 (insufficiency)      | 1   |
|                          |     | Serum 25(OH)D 32 to 100 (sufficiency)       | 1   |
| Roth 2009                | 64  | < 40 nmol/L                                 | 3   |
| Wayse 2004               | 80  | Plasma 25(OH)D3 > 22.5 nmol/L               | 26  |
|                          |     | Plasma 25(OH)D3 > 50 nmol/L                 | 4   |
| Mathias 2017             | 41  | 25(OH)D < 20 ng/ml                          | 28  |

|              |      |                               |     |
|--------------|------|-------------------------------|-----|
|              |      | 25(OH)D < 30 ng/ml            | 36  |
| Dhandai 2018 | 60   | Deficiency: < 20 ng/ml        | 38  |
|              |      | Insufficiency: <29 ng/ml      | 17  |
|              |      | Optimum: 30-50 ng/ml          | 5   |
| Vo 2018      | 1016 | 25(OH)D < 20 ng/ml            | 298 |
|              |      | 20-29.9 ng/ml                 | 352 |
|              |      | >=30 ng/ml                    | 366 |
| Li 2018      | 797  | Severe deficiency: < 10 ng/mL | 159 |
|              |      | Deficiency: 10–20 ng/mL       | 286 |
|              |      | Insufficiency: 20– 30 ng/mL   | 223 |
|              |      | Sufficiency: > 30 ng/mL       | 127 |

25(OH)D in nmol/L = 25(OH)D in ng/mL multiplied by 2.496

**Additional Table 4B Circulating 25(OH)D threshold levels used in the selected studies for prevalence in sepsis**

| Study                    | Number of cases                                     | 25(OH)D categories (as provided by each study) | Number of cases |
|--------------------------|-----------------------------------------------------|------------------------------------------------|-----------------|
| Asilioglu 2017           | 30<br>sepsis                                        | Deficiency: <20 ng/mL                          | 20              |
|                          |                                                     | Sufficiency: >=20 ng/mL                        | 10              |
| Say 2017                 | 100<br>neonatal sepsis                              | Severe deficiency (group 1) <5 ng/mL           | 63              |
|                          |                                                     | Insufficiency (group2): 5 to 15 ng/mL          | 24              |
|                          |                                                     | Sufficiency (group 3) ≥15 ng/mL                | 13              |
| El-Gamasy 2017           | 46<br>sepsis                                        | Serious deficiency: < 30 nmol/L                | 20              |
|                          |                                                     | Insufficiency: 30-75 nmol/L                    | 18              |
|                          |                                                     | Adequate levels >75 nmol/L                     | 8               |
| Sankar 2017              | 43<br>septic shock                                  | Severe deficiency: serum 25 (OH) D <10 ng/mL   | 31              |
| Shah 2016                | 100<br>sepsis                                       | 25(OH)D <20 ng/mL                              | 84              |
|                          |                                                     | 25(OH)D >=20 ng/mL                             | 26              |
| Ponnarmeni 2016          | 124<br>sepsis                                       | Deficiency: <50nmol/L                          | 63              |
|                          |                                                     | Insufficiency: 50-75 nmol/L                    | 31              |
|                          |                                                     | <75, insufficient + deficient                  | 94              |
|                          |                                                     | Sufficiency: >75 nmol/L                        | 30              |
| Bustos 2016              | 10<br>sepsis intraabdominal                         | Deficiency: < 20 ng/ml                         | 7               |
|                          |                                                     | Normal levels: > 20 ng/mL                      | 3               |
| Ebenezer 2016            | 16<br>shock                                         | 25(OH)D <20 ng/mL                              | 8               |
|                          |                                                     | 25(OH)D >=20 ng/mL                             | 8               |
| Onwuneme 2015 (1)        | 35<br>culture positive sepsis                       | 25(OH)D <50 ng/mL                              | 32              |
|                          |                                                     | 25(OH)D >=50 ng/mL                             | 3               |
| Onwuneme 2015 (2)        | 46<br>culture positive sepsis and late-onset sepsis | Deficiency: < 30 nmol/L                        | 32              |
|                          |                                                     | Sufficiency: ≥ 30 nmol/L                       | 14              |
| Prasad 2015              | 11<br>positive blood culture                        | 25(OH)D <20 ng/mL                              | 9               |
|                          |                                                     | 25(OH)D >=20 ng/mL                             | 2               |
| Korwutthikulrangsri 2015 | 17<br>shock and septicaemia                         | 25(OH)D <20 ng/mL                              | 14              |
|                          |                                                     | 25(OH)D >=20 ng/mL                             | 3               |
| Cizmez 2015              | 40<br>suspected sepsis                              | Deficiency: ≤20 ng/ml                          | 28              |
|                          |                                                     | Insufficiency: 21–29 ng/ml                     | 7               |
|                          |                                                     | Normal levels: ≥30 ng/ml                       | 5               |
| Dayal 2014               | 9<br>nosocomial sepsis                              | 25(OH)D <20 ng/mL                              | 4               |
|                          |                                                     | 25(OH)D >=20 ng/mL                             | 5               |
| Hebbar 2014              | 30<br>shock and/or Sepsis                           | 25(OH)D <20 ng/mL                              | 17              |
|                          |                                                     | 25(OH)D >=20 ng/mL                             | 13              |
| McNally2012              | 48<br>septic                                        | 25(OH) D levels: <50 nmol/L                    | 33              |
|                          |                                                     | 25(OH) D levels: ≥50 nmol/L                    | 15              |
| Mathias 2017             | 41<br>sepsis, severe sepsis or septic shock         | 25(OH)D < 20 ng/ml                             | 28              |
|                          |                                                     | 25(OH)D < 30 ng/ml                             | 36              |
| Dhandai 2018             | 60<br>sepsis                                        | Deficiency: < 20 ng/ml                         | 38              |
|                          |                                                     | Insufficiency: <29 ng/ml                       | 17              |
|                          |                                                     | Optimum: 30-50 ng/ml                           | 5               |

**Additional Table 5 Studies with thresholds other than < 50 nmol/L**

| <b>Study</b>      | <b>Threshold used by study</b> |
|-------------------|--------------------------------|
| Roth 2009         | < 40 nmol/L                    |
| Roth 2010         | < 40 nmol/L                    |
| Say 2017          | <=15 ng/mL (37.4 nmol/L)       |
| Inamo 2011        | <=15 ng/mL (37.4 nmol/L)       |
| Ayulo 2014        | <=15 ng/mL (37.4 nmol/L)       |
| Dinlen 2016       | <=15 ng/mL (37.4 nmol/L)       |
| Onwuneme 2015 (2) | < 30 nmol/L                    |
| Yaghmaie 2017     | < 30 ng/mL (74.88 nmol/L)      |
| El-Gamasy 2017    | < 30 nmol/L                    |
| Banajeh 2009      | < 30 nmol/L                    |
| Sankar 2017       | <= 10 ng/mL (24.9 nmol/L)      |
| Cetinkaya 2015    | <= 10 ng/mL (24.9 nmol/L)      |

25(OH) D values nmol/L = ng/mL \* 2.496

**Additional Table 6 Excluded studies**

| <b>Study</b> | <b>Design</b>               | <b>Sample size</b>              | <b>Characteristics of pediatric population</b>                                                                                                                                                                                                                                                                          | <b>Country</b> | <b>Reasons for exclusion of paper</b>              |
|--------------|-----------------------------|---------------------------------|-------------------------------------------------------------------------------------------------------------------------------------------------------------------------------------------------------------------------------------------------------------------------------------------------------------------------|----------------|----------------------------------------------------|
| Seliem 2016  | Hospital-based case-control | Cases, n= 30<br>Controls, n= 30 | Cases: group 1, full-term neonates with EOS and their mothers.<br>Controls, group 2: 30 full-term healthy neonates and their mothers with no clinical or laboratory evidence of sepsis.                                                                                                                                 | Egypt          | Requested data without reply or data not available |
| Gamal 2017   | Case-control                | Cases, n= 50<br>Control, n= 30  | Cases: neonates with early onset neonatal sepsis that occurred at <72 hours<br>Controls: Age and sex healthy neonates with no prenatal risk factor for early neonatal sepsis enrolled in the study as a control group.                                                                                                  | Egypt          | Requested data without reply or data not available |
| Aydemir 2014 | Hospital-based case control | Cases, n=40<br>Controls, n= 20  | Cases: children with sepsis between 1 and 16 years old<br>Controls: children without sepsis                                                                                                                                                                                                                             | Turkey         | Requested data without reply or data not available |
| Garg 2016    | Hospital-based case-control | Cases, n= 40<br>Controls, n= 40 | Cases: children from 6 months to 5 years of age admitted or attending OPD in department of Pediatrics.<br>Controls: children receiving care at the Hospital's ambulatory, emergency or in-patient units and presenting with non-respiratory complaints also not having any clinical indication of vitamin D deficiency. | India          | Requested data without reply or data not available |

**Additional Table 7 Characteristics of the 52 included studies**

| Study             | Design                                      | Number of cases (controls, where appropriate) | Characteristics of population                                                                                                                                                         | Country and setting | Vitamin D thresholds as defined by the study                                                                      | Quality score (NOS) |
|-------------------|---------------------------------------------|-----------------------------------------------|---------------------------------------------------------------------------------------------------------------------------------------------------------------------------------------|---------------------|-------------------------------------------------------------------------------------------------------------------|---------------------|
| Asilioglu 2017    | Historical cohort (single centre)           | 250                                           | Cases: aged 1 month to ≤18 years                                                                                                                                                      | Turkey, PICU        | Deficiency: <20 ng/mL                                                                                             | 7                   |
| Halwany 2017      | Cohort (single centre)                      | 102                                           | Cases: children aged >1 month to ≤ 5 years                                                                                                                                            | Egypt, PICU         | Deficiency: <20 ng/ml<br>Insufficiency: 20-29.9 ng/ml<br>“Normal” levels: 30 ng/ml                                | 6                   |
| Hurwitz 2017      | Prospective cohort (single centre)          | 90                                            | Cases: aged <5 years hospitalized with LRTI and RSV and/or hMPV                                                                                                                       | USA, PICU           | Deficiency: <20 ng/mL                                                                                             | 6                   |
| Garcia-Soler 2017 | Cohort (single centre)                      | 340                                           | Cases: aged 6 months to 17 years<br>Critically ill with various conditions                                                                                                            | Spain, PICU         | Deficient: <20 ng/mL<br>Insufficiency: 20-30 ng/mL<br>25(OH)D levels: 30-40 ng/mL<br>Optimal levels >40 ng/mL     | 7                   |
| Badawi 2017       | Cohort (single centre)                      | 88                                            | Cases: 1 month to 12 years                                                                                                                                                            | Egypt, PICU         | Deficiency: < 50nmol/l,<br>Severe deficiency: <30 nmol/l                                                          | 8                   |
| Jia 2017          | Hospital-based case-control (single centre) | 110 (110)                                     | Cases: infants (< 1 year of age) with ALRTI<br>Controls: Healthy from similar areas attending the hospital for vaccination during study period                                        | China, PICU         | Severe deficiency: <10 ng/ml<br>Deficiency: 10-20 ng/ml<br>Insufficiency: 21-30 ng/ml<br>Sufficiency: >30 ng/ml   | 7                   |
| Yaghmaie 2017     | Cross sectional (single centre)             | 82                                            | Cases: hospitalized in PICU                                                                                                                                                           | Iran, PICU          | Deficiency: <30 ng/ml                                                                                             | 4                   |
| Say 2017          | Case-control (single centre)                | 100 (13)                                      | Cases: premature infants less than 37 weeks diagnosed with early or late -onset neonatal sepsis<br>Controls: From same population of neonates with sepsis but not vitamin D deficient | Turkey, NICU        | Severe deficiency (group 1) <5 ng/mL.<br>Insufficiency (group2): 5 to 15 ng/mL<br>Sufficiency (group 3) ≥15 ng/mL | 6                   |



|                 |                                             |           |                                                                                                                                                                                                                                                    |                    |                                                                                       |   |
|-----------------|---------------------------------------------|-----------|----------------------------------------------------------------------------------------------------------------------------------------------------------------------------------------------------------------------------------------------------|--------------------|---------------------------------------------------------------------------------------|---|
| El-Gamasy 2017  | Cohort (single centre)                      | 80 (20)   | Cases: 3 months to 12 years hospitalized with acute kidney injury<br>Controls: completely healthy subjects                                                                                                                                         | Egypt, PICU        | Seriously deficient: < 30 nmol/L<br>Insufficient: 30-75 nmol/L<br>Adequate >75 nmol/L | 7 |
| Sankar 2017     | Cohort (single centre)                      | 43        | Cases: <=17 years of age                                                                                                                                                                                                                           | India, PICU        | Severe vitamin D deficiency: serum 25 (OH) D <10 ng/mL                                | 8 |
| Shah 2016       | Cohort (single centre)                      | 154       | Cases: aged between 1 month and 15 years                                                                                                                                                                                                           | India, PICU        | Deficiency: <20 µg/mL                                                                 | 6 |
| Ponnarmeni 2016 | Cohort (single centre)                      | 124 (338) | Cases: aged 1–12 years admitted with a diagnosis of sepsis<br>Controls: from previous prospective study, apparently healthy children of upper socioeconomic status who attended the out-patient department for immunization or with minor ailments | India, PICU        | Deficiency: < 50 nmol/L<br>Insufficiency: 50-75 nmol/L<br>Sufficiency: > 75 nmol/L    | 6 |
| Sankar 2016     | Cohort (single centre)                      | 101       | Cases: aged 1 month to 17 years                                                                                                                                                                                                                    | India, PICU        | Deficiency: ≤ 20 ng/ml<br>Severe deficiency: <15 ng/mL                                | 8 |
| Bustos 2016     | Cohort (single centre)                      | 90        | Cases: critically ill, greater than 37 weeks and less than 15 years of age                                                                                                                                                                         | Chile, PICU        | Deficiency: < 20 ng/ml<br>Normal levels: > 20 ng/mL                                   | 7 |
| Ebenezer 2016   | Cohort (single centre)                      | 52        | Cases: <18 years of age; medical and surgical diagnoses                                                                                                                                                                                            | India, PICU        | Deficiency: < 20 ng/ml<br>Insufficiency: 20–30 ng/ml<br>Normal levels: ≥ 20 ng/L      | 6 |
| Elmoneim 2016   | Cohort (single centre)                      | 30        | Cases: aged less than 14 years<br>Controls: with “normal” vitamin D levels                                                                                                                                                                         | Saudi Arabia, PICU | Deficiency: < 20ng/ml<br>Insufficiency: 20-30 ng/mL<br>Normal: > 30 ng/mL             | 7 |
| Jat 2016        | Hospital-based case-control (single centre) | 50 (50)   | Cases: 1 month to 12 years of age admitted with pneumonia<br>Controls: admitted for reasons other than respiratory symptoms, required blood sampling                                                                                               | India, PICU        | Deficiency: < 20 ng/ml<br>Insufficiency: 20-30 ng/ml<br>Sufficiency: >= 30 ng/ml      | 8 |
| Narang 2016     | Hospital-based case-control (single centre) | 50 (50)   | Cases: 2 months to 5 years of age admitted as in-patients or seen in the outpatient department with ALRI<br>Controls: healthy, same age group, attending outpatients’ service for immunization or admitted for minor conditions other than ALRI    | India, PICU        | Severe deficiency: < 20ng/ml                                                          | 6 |

|                         |                                             |          |                                                                                                                                                                                                                 |                |                                                                                          |   |
|-------------------------|---------------------------------------------|----------|-----------------------------------------------------------------------------------------------------------------------------------------------------------------------------------------------------------------|----------------|------------------------------------------------------------------------------------------|---|
| Dinlen 2016             | Hospital-based case-control (single centre) | 30 (30)  | Cases: term neonates with ALRI<br>Controls: healthy neonates, same age as the study group.                                                                                                                      | Turkey, NICU   | Deficient: $\leq 15$ ng/mL<br>Severe deficiency: $\leq 5$ ng/mL                          | 6 |
| Lopez 2016              | Prospective cohort (multi centre)           | 347      | Cases: 0 to $>48$ months admitted to hospital with ALRI prospectively recruited through the GENDRES (GENetic, vitamin D and RESpiratory infections research network)                                            | Spain, PICU    | 25-OHD levels: $<10$ ng/mL<br>25-OHD levels: 10-20 ng/mL<br>25-OHD levels: 20-30 ng/mL   | 8 |
| Alvarez 2016            | Cross-sectional (single centre)             | 50       | Cases: patients aged 0 to 18 years                                                                                                                                                                              | USA, PICU      | 25(OH)D $< 20$ ng/mL<br>25(OH)D $< 30$ ng/mL                                             | 6 |
| Onwuneme 2015 (1)       | Cohort (single centre)                      | 120 (30) | Cases: with suspected sepsis ( $<12$ years old)<br>Controls: paediatric controls admitted for elective day case surgery during the same study period and were not suspected of having sepsis                    | Ireland, PICU  | 25(OH) D levels: $<50$ nmol/L<br>25(OH) D levels: $\geq 50$ nmol/L                       | 8 |
| Onwuneme 2015 (2)       | Cohort (single centre)                      | 94       | Cases: preterm infants $<32$ weeks gestation                                                                                                                                                                    | Ireland, NICU  | Deficiency: $< 30$ nmol/L<br>Sufficiency: $\geq 30$ nmol/L                               | 8 |
| Prasad 2015             | Cohort (single centre)                      | 80       | Cases: 2 months to 12 years old                                                                                                                                                                                 | India, PICU    | Deficiency: $< 20$ ng/ml<br>Sufficient: $\geq 20$ ng/mL                                  | 7 |
| Moreno-Solis 2015       | Hospital-based case-control (single centre) | 48 (30)  | Cases: aged 1–11 months with acute bronchiolitis<br>Controls: healthy, $<12$ months, admitted to the outpatient clinic without respiratory symptoms or history of hospitalization for bronchiolitis or wheezing | Spain, PICU    | Deficiency: $< 20$ ng/ml<br>Insufficiency: 21–29 ng/ml<br>Sufficiency: $\geq 30$ ng/ml   | 6 |
| Alonso 2015             | Cross sectional (single centre)             | 288      | Cases: aged 1 month to 13 years                                                                                                                                                                                 | Spain, PICU    | Deficient: $< 20$ ng/ml and $< 10$ ng/ml                                                 | 5 |
| Korwutthikulrangsi 2015 | Cohort (single centre)                      | 32 (36)  | Cases: requiring PICU admission<br>Controls: Healthy, enrolled during the same period of time and served as the control group (age in months)                                                                   | Thailand, PICU | Deficiency: $< 20$ ng/mL<br>Insufficiency: 20-29.9 ng/ml<br>Sufficiency: $\geq 30$ ng/mL | 7 |
| Khakshour 2015          | Case-control                                | 37 (53)  | Cases: below 5 years of age and suffering from respiratory infections<br>Controls: those who were not suffering from respiratory infections                                                                     | Iran, PICU     | Deficiency: $< 20$ ng/mL                                                                 | 5 |

|                |                                             |           |                                                                                                                                                                                                                                                                                             |              |                                                                                                                                        |   |
|----------------|---------------------------------------------|-----------|---------------------------------------------------------------------------------------------------------------------------------------------------------------------------------------------------------------------------------------------------------------------------------------------|--------------|----------------------------------------------------------------------------------------------------------------------------------------|---|
| Cizmecci 2015  | Case-control (single centre)                | 40 (43)   | Cases: infants with suspected early-onset neonatal sepsis.<br>Controls: For each newborn of group 1, one healthy infant selected as a control                                                                                                                                               | Turkey, NICU | Deficiency: $\leq 20$ ng/ml<br>Insufficiency: 21–29 ng/ml<br>Normal levels: $\geq 30$ ng/ml                                            | 7 |
| Cetinkaya 2015 | Hospital-based case-control (single centre) | 50 (50)   | Cases: term infants with clinically suspected (probable) early infection (early-onset sepsis) within the first 3 postnatal days of life and were $>37$ weeks of gestational age<br>Controls: healthy infants with no signs of clinical/laboratory infection                                 | Turkey, NICU | Severe deficiency: $<10$ ng ml <sup>-1</sup><br>Insufficiency: 11 to 32 ng ml <sup>-1</sup><br>Adequacy: 32 to 100 ng ml <sup>-1</sup> | 6 |
| Ayulo 2014     | Cohort (single centre)                      | 216       | Cases: between the ages of 1 and 21 years                                                                                                                                                                                                                                                   | Spain, PICU  | Deficient: $< 15$ ng/ml<br>Insufficient: 15-29 ng/mL<br>Sufficient: $\geq 30$ ng/mL                                                    | 7 |
| Dayal 2014     | Cohort (single centre)                      | 92        | Cases: Children aged 3 months to 12 years                                                                                                                                                                                                                                                   | India, PICU  | Deficiency: $< 50$ nmol/L<br>Insufficiency: 50–75 nmol/L<br>Sufficiency: $> 75$ nmol/L<br>25(OH) D levels: $< 75$ nmol/L               | 6 |
| Hebbar 2014    | Cohort (single centre)                      | 61 (46)   | Cases: children 0 to 18 years<br>Controls: patients recruited among children in the magnetic resonance imaging suite.                                                                                                                                                                       | USA, PICU    | Deficient: $\leq 10$ ng/ml<br>Insufficient: 10 to 20 ng/ml<br>Sufficient: $\geq 20$ ng/mL                                              | 6 |
| Rey 2014       | Cohort (single centre)                      | 156 (289) | Cases: heterogeneous group of critically ill children aged $<16$ years<br>Control group for comparison: population of healthy children                                                                                                                                                      | Spain, PICU  | Deficient: $< 20$ ng/ml                                                                                                                | 7 |
| Ahmed 2014     | Hospital-based case-control (single centre) | 50 (50)   | Cases: aged 2–60 months hospitalized with ALRI<br>Controls: age-matched with cases within 1 or 2 months, attending well-child clinics or general clinics without evidence of respiratory infection or admitted to the hospital for elective surgery                                         | Africa, PICU | Deficiency: $<50$ nmol/L                                                                                                               | 8 |
| Basha 2014     | Hospital-based case-control (single centre) | 81 (89)   | Cases: under 5 years old with severe pneumonia selected from the inpatient departments and emergency units of the hospital<br>Controls: healthy, selected from the outpatient surgical clinics of the hospital during their visit for umbilical or inguinal hernia repair and not suffering | Egypt, PICU  | Deficiency: $< 50$ nmol/L<br>Insufficiency: $< 75$ nmol/L<br>Sufficiency: $> 75$ nmol/L                                                | 7 |

|                |                                               |         |                                                                                                                                                                                    |                  |                                                                                                                      |   |
|----------------|-----------------------------------------------|---------|------------------------------------------------------------------------------------------------------------------------------------------------------------------------------------|------------------|----------------------------------------------------------------------------------------------------------------------|---|
|                |                                               |         | from upper or lower respiratory infections                                                                                                                                         |                  |                                                                                                                      |   |
| Sakka 2014     | Population based case-control (single centre) | 96 (96) | Cases: <2 years old with ALRI, 48 diagnosed with pneumonia and 48 with bronchiolitis<br>Controls: age and sex matched with no respiratory symptoms or signs from the Health office | Egypt, PICU      | Severe deficiency: 0–5 ng/mL<br>Deficiency: 5–15 ng/mL<br>Insufficiency: 15–20 ng/mL<br>Sufficiency: 20–100 ng/mL    | 8 |
| Cayir 2014     | Hospital-based case-control (single centre)   | 88 (81) | Cases: 1 to 13 years diagnosed with acute otitis media<br>Controls: Healthy same age range                                                                                         | Turkey, PICU     | Normal levels: 20 ng/mL<br>Insufficiency: 15–20ng/mL<br>Deficiency: <15ng/mL                                         | 7 |
| Binks 2014     | Cross-sectional                               | 74      | Cases: aged <3 years admitted with acute lower respiratory infections (ALRIs) or other conditions                                                                                  | Australia, PICU  | 25(OH) D levels: < 50 nmol/L                                                                                         | 6 |
| Madden 2012    | Cohort (single centre)                        | 511     | Cases: less than 21 years old                                                                                                                                                      | USA, PICU        | 25(OH) D levels: < 10 ng/mL<br>25(OH) D levels: 10–19.9 ng/mL<br>Deficiency: < 20 ng/ml<br>Insufficiency: < 30 ng/mL | 8 |
| Rippel 2012    | Cohort (single centre)                        | 316     | Cases: children aged 16.5 (3.1–75.2) months                                                                                                                                        | Australia, PICU  | Deficiency: < 50 nmol/L<br>“Normal” levels: ≥ 50 nmol/L                                                              | 8 |
| McNally 2012   | Cohort (multi-centre)                         | 326     | Cases: Newborn to 17 years of age                                                                                                                                                  | Canada, PICUs    | Deficiency: < 50 nmol/L<br>25(OH) D levels: 50 to 75 nmol/L                                                          | 7 |
| Inamo 2011     | Cohort (single centre)                        | 28      | Cases: between 1 and 48 months hospitalized with ALRI, 26 diagnosed with bronchiolitis and two as having pneumonia                                                                 | Japan, PICU      | Deficiency: ≤ 15ng/ml<br>Severe deficiency: ≤ 5ng/mL                                                                 | 6 |
| Roth 2010      | Hospital-based case-control (single centre)   | 25 (25) | Cases: 1–18 months hospitalized with ALRI<br>Controls: selected by population-based sampling. aged 1–23 months, and matched to cases on age (±2 months) and sex                    | Bangladesh, PICU | Deficiency: < 40 nmol/L                                                                                              | 8 |
| Banajeh 2009   | Prospective cohort (single centre)            | 79      | Cases: 2–59 months with WHO-defined very severe community acquired (VSP) pneumonia                                                                                                 | Iran, PICU       | Deficiency: < 30 nmol/L                                                                                              | 7 |
| Karatekin 2009 | Hospital-based case-                          | 25 (15) | Cases: newborns with acute respiratory infections                                                                                                                                  | Turkey, NICU     | Deficiency: < 20 ng/ml                                                                                               | 6 |

|              |                                                            |           |                                                                                                                                                                                                    |                 |                                                                                                                                |   |
|--------------|------------------------------------------------------------|-----------|----------------------------------------------------------------------------------------------------------------------------------------------------------------------------------------------------|-----------------|--------------------------------------------------------------------------------------------------------------------------------|---|
|              | control,<br>(single<br>centre)                             |           | Controls: healthy, age matched from<br>outpatients' service where they went for<br>immunization.                                                                                                   |                 |                                                                                                                                |   |
| Roth 2009    | Hospital-<br>based case-<br>control<br>(single<br>centre)  | 64 (65)   | Cases: aged 1-25 months admitted with<br>ALRI<br>Controls: aged 1-25 months undergoing<br>elective surgery, no history of<br>hospitalization for ALRI                                              | Canada,<br>PICU | Deficiency: < 40<br>nmol/L                                                                                                     | 7 |
| Wayse 2004   | Hospital-<br>based case-<br>control,<br>(single<br>centre) | 80 (70)   | Cases: < 5 years with severe ALRI<br>Controls: healthy, attending outpatients<br>service for immunization                                                                                          | India,<br>PICU  | Deficiency: Plasma<br>25(OH)D3 < 50<br>nmol/L                                                                                  | 6 |
| Mathias 2017 | Prospective<br>cohort<br>(single<br>centre)                | 41        | Cases: less than 18 years admitted with<br>diagnosis of sepsis, severe sepsis or septic<br>shock.                                                                                                  | USA,<br>PICU    | 25(OH)D levels < 20<br>ng/ml<br>25(OH)D levels <30<br>ng/ml                                                                    | 6 |
| Dhandai 2018 | Cohort<br>(multi-<br>centre)                               | 60 (60)   | Cases: neonates admitted with late-onset<br>sepsis (LOS)<br>Controls: neonates admitted during same<br>period with clinically significant<br>physiological hyperbilirubinaemia<br>(without sepsis) | India,<br>NICU  | Deficiency: < 20 ng/ml<br>Insufficiency: <29<br>ng/ml<br>Optimum: 30-50 ng/ml                                                  | 7 |
| Vo 2018      | Prospective<br>cohort<br>(multi-<br>centre)                | 1016      | Cases: Infants less than twelve months<br>old hospitalized for bronchiolitis                                                                                                                       | USA,<br>PICU    | 25(OH)D < 20 ng/ml<br>25(OH)D: 20-29.9<br>ng/ml<br>25(OH)D >= 30 ng/ml                                                         | 8 |
| Li 2018      | Case-<br>control<br>(single-<br>centre)                    | 797 (785) | Cases: children with pneumonia or<br>pneumonia-induced sepsis group                                                                                                                                | China,<br>PICU  | Severe deficiency: <<br>10 ng/mL<br>Deficiency: 10-20<br>ng/mL<br>Insufficiency: 20- 30<br>ng/mL<br>Sufficiency: > 30<br>ng/mL | 8 |

LRTI = lower respiratory tract infection; PICU = paediatric intensive care unit; RSV = respiratory syncytial virus; ALRI = acute lower respiratory infection; WHO = World Health Organization; VSP = very severe community acquired pneumonia; NICU = neonatal intensive care unit.

**Additional Table 8 Objectives and outcomes of included studies**

| Study             | Objectives/aims of study                                                                                                                                                                                                          | Main outcome(s) and conclusion(s)                                                                                                                                                                                                                                                                                                                                                                                                            |
|-------------------|-----------------------------------------------------------------------------------------------------------------------------------------------------------------------------------------------------------------------------------|----------------------------------------------------------------------------------------------------------------------------------------------------------------------------------------------------------------------------------------------------------------------------------------------------------------------------------------------------------------------------------------------------------------------------------------------|
| Madden 2012       | Prevalence of vitamin D deficiency in critically ill children and factors influencing admission 25-hydroxyvitamin D (25(OH)D) levels                                                                                              | Identified high prevalence of vitamin D deficiency and insufficiency in critically ill children. Inverse association severity of illness on admission and 25(OH) levels                                                                                                                                                                                                                                                                      |
| Lopez 2016        | Role of Vitamin D in Children hospitalized with Lower Tract Acute Respiratory Infections                                                                                                                                          | 25-hydroxyvitamin D levels of study population below normal range. Correlation of higher disease severity with lower levels of 25-hydroxyvitamin D.                                                                                                                                                                                                                                                                                          |
| Garcia-Soler 2017 | Prevalence and risks factors of vitamin D deficiency, as well as its relationship with length of PICU stay morbidity and mortality in a PICU.                                                                                     | Vitamin D deficiency is frequent in paediatric critical patients. It also has an association with higher severity scores, season of year and parental educational attainment. Vitamin D levels associated with various laboratory parameters of SIRS. Vitamin D deficiency associated with increased risk of morbidity and mortality. Inconclusive findings on its association with PICU length of stay were inconclusive                    |
| McNally 2012      | Prevalence of vitamin D deficiency, risk factors and potential association with clinically relevant outcomes in critically ill children in Canada.                                                                                | Most of critically ill children vitamin D deficient at PICU admission. Lower 25(OH) D levels associated with increased catecholamine requirements, fluid bolus administration, hypocalcemia, and longer PICU admission.                                                                                                                                                                                                                      |
| Rippel 2012       | Prevalence of hypovitaminosis D and association with outcome in critically ill children requiring admitted in intensive care.                                                                                                     | Hypovitaminosis D is frequent in critically ill children in PICU, especially in infants and children with heart disease. Hypovitaminosis D associated with hypocalcemia in non-cardiac population, and increased need for calcium replacement in the cardiac population. No association between vitamin D status and survival or PICU length of stay. Strong association with early postoperative inotropic needs in the cardiac population. |
| Alonso 2015       | Investigate relationship of serum 25-hydroxyvitamin D concentrations with serum parathyroid hormone (PTH) levels, body mass index (BMI), and environmental factors in a population of Caucasian children living at latitude 43°N. | Results doubt the assumption that a serum 25OH D threshold indicates vitamin D deficiency in children.                                                                                                                                                                                                                                                                                                                                       |
| Asiloglu 2017     | Measure occurrence of VDD in critically ill children. Assess determinants of vitamin D status and compare vitamin D deficient and sufficient cases in respect of severity of illness.                                             | Hypovitaminosis D occurrence high in critically ill children and associated with higher vasopressor requirement. Not associated with other markers of illness severity including mortality.                                                                                                                                                                                                                                                  |
| Ayulo 2014        | Prevalence of vitamin D deficiency among children in PICU                                                                                                                                                                         | Vitamin D deficiency common. No significant correlation between disease severity and vitamin D levels levels of vitamin D. Mortality associated with vitamin D levels                                                                                                                                                                                                                                                                        |
| Rey 2014          | Identify prevalence of 25 hydroxivitamin D or 25(OH) vitamin D deficiency on pediatric intensive care unit (PICU) admission, and if associated with increased prediction of mortality risk scores.                                | Hypovitaminosis D incidence high in PICU patients. Hypovitaminosis D not associated with higher prediction of risk mortality scores.                                                                                                                                                                                                                                                                                                         |
| Shah 2016         | Determine prevalence of vitamin D deficiency in critically ill children its association with illness severity, parathyroid response and clinical outcomes.                                                                        | High prevalence of vitamin D deficiency. Parathyroid gland response secondary vitamin D deficiency or hypocalcemia impaired in critically ill.                                                                                                                                                                                                                                                                                               |
| Ponnarmeni 2016   | Vitamin D deficiency in critically ill children with sepsis admitted to PICU and its association with: mortality, length of stay, illness severity, requirement for ventilation and catecholamines                                | High prevalence of vitamin D deficiency<br>No significant association between vitamin D deficiency and other outcomes such as mortality                                                                                                                                                                                                                                                                                                      |
| Onwuneme 2015 (1) | Assess vitamin D status, and its determinants, in children with suspected sepsis admitted to PICU. Also investigated association between vitamin D status and clinical outcomes.                                                  | Children admitted to the PICU with suspected sepsis lower 25OH D compared to controls. Inadequate 25 OH D levels associated with confirmed sepsis and poor outcomes.                                                                                                                                                                                                                                                                         |
| Jia 2017          | Association of vitamin D with ALRTI in Chinese infants                                                                                                                                                                            | Lowered plasma level of 25-OH Vitamin D makes children susceptible to ALRTI.                                                                                                                                                                                                                                                                                                                                                                 |
| Halwany 2017      | Frequency of vitamin D deficiency in critically ill pediatric intensive care unit [PICU] patients and relation to state of serum 25(OH) D to disease severity.                                                                    | High prevalence of vitamin D deficiency in critically ill children. Negative correlation of Vitamin D level with PELOD score. Recommend screening of critically ill children for vitamin D deficiency to restore their serum levels.                                                                                                                                                                                                         |

|                  |                                                                                                                                                                                                                                                                                                                                                              |                                                                                                                                                                                                                                                                                                                                                                                                                                                                |
|------------------|--------------------------------------------------------------------------------------------------------------------------------------------------------------------------------------------------------------------------------------------------------------------------------------------------------------------------------------------------------------|----------------------------------------------------------------------------------------------------------------------------------------------------------------------------------------------------------------------------------------------------------------------------------------------------------------------------------------------------------------------------------------------------------------------------------------------------------------|
| Sankar 2016      | Prevalence of vitamin D deficiency on admission and examine association with length of ICU stay                                                                                                                                                                                                                                                              | High prevalence of vitamin D deficiency. Vitamin D deficient children with longer ICU stay duration or mortality                                                                                                                                                                                                                                                                                                                                               |
| Say 2017         | Evaluate effects of low vitamin D levels in cord blood on neonatal sepsis in preterm infants.                                                                                                                                                                                                                                                                | No significant relationship between the cord blood vitamin D levels and the risk of neonatal sepsis in premature infants.                                                                                                                                                                                                                                                                                                                                      |
| Sakka 2014       | Determine the relation between vitamin D deficiency, anemia and the severity of ALRTIs in hospitalized children.                                                                                                                                                                                                                                             | Vitamin D deficiency, low BMI, low hemoglobin level, rachitic signs were risk factors for the severity of ALRTIs.                                                                                                                                                                                                                                                                                                                                              |
| Onwuneme2015 (2) | Investigate the association between serum 25-hydroxyvitamin D (25OHD) levels and outcomes in preterm infants (<32 weeks gestation).                                                                                                                                                                                                                          | High prevalence of low 25OHD. Association between vitamin D status and acute respiratory morbidity in preterm infants after birth. In none of the following outcomes was the difference statistically significant: surfactant use, inotrope requirement, RDS, pneumothorax, pulmonary hemorrhage, chronic lung disease, sepsis, retinopathy of prematurity, intraventricular hemorrhage, periventricular leucomalacia, patent ductus arteriosus, and mortality |
| Dayal 2014       | Prevalence of vitamin D deficiency<br>Association of serum vitamin D levels with duration of stay in hospital, mortality and requirement of ventilation                                                                                                                                                                                                      | Reduced serum vitamin D levels in children                                                                                                                                                                                                                                                                                                                                                                                                                     |
| Bustos 2016      | Determine prevalence of vitamin D deficiency and its association with other clinically relevant outcomes in children admitted to Paediatric Intensive Care Unit                                                                                                                                                                                              | Vitamin D deficiency was prevalent in critically ill children and associated with adverse clinical outcomes.                                                                                                                                                                                                                                                                                                                                                   |
| Hurwitz 2017     | Measure retinol binding protein and vitamin D in children aged <5 years hospitalized with lower respiratory tract infection and respiratory syncytial virus and/or human meta pneumovirus detections                                                                                                                                                         | Low vitamin levels in 50% of the children and associated with significantly elevated risk of the need for intensive care unit admission and invasive mechanical ventilation.                                                                                                                                                                                                                                                                                   |
| Cayir 2014       | Investigate the relationship between Vitamin D deficiency and acute otitis media infection                                                                                                                                                                                                                                                                   | Serum 25-hydroxy vitamin D levels significantly lower in children with acute otitis media compared to the controls. Vitamin D deficiency plays a role in otitis media infection.                                                                                                                                                                                                                                                                               |
| Badawi 2017      | Investigated if VDD is related to higher severity scores and organ dysfunction. Primary objective of study was to estimate the prevalence of VDD in a group of critically ill children, and secondary objectives was to correlate vitamin D status with pediatric logistic organ dysfunction (PELOD) and pediatric risk of mortality III (PRISM III) scores. | VDD prevalence was reported in about half of the critically ill patients, and it was observed to be related to multiple organ dysfunctions and rapid clinical deterioration.                                                                                                                                                                                                                                                                                   |
| Yaghmaie 2017    | Investigate relation of vitamin D deficiency with potential demographic and clinical factors.                                                                                                                                                                                                                                                                | Vitamin D deficiency among paediatric intensive care unit patients similar to western countries, also with similar age and BMI distribution. Significant relation observed between age and serum level of vitamin D.                                                                                                                                                                                                                                           |
| Basha 2014       | Aimed to evaluate vitamin D status as a risk factor for severe pneumonia in Egyptian hospitalized children under 5 years                                                                                                                                                                                                                                     | Significant association between vitamin D deficiency and severe pneumonia in Egyptian children below 5 years                                                                                                                                                                                                                                                                                                                                                   |
| Prasad 2015      | Prevalence of vitamin D deficiency in critically ill children and association with illness severity & other outcomes                                                                                                                                                                                                                                         | High prevalence of vitamin D deficiency in critically ill children and association with PRISM III scores in a developing country.<br>Groups did not differ in terms of PICU stay, duration of hospital stay, culture positivity, biochemical parameters (serum calcium, serum phosphate), need of ventilation or steroids, presence of coagulopathy and mortality.                                                                                             |
| Wayse 2004       | If vitamin D deficiency in Indian children under 5 years old of age is risk factor for severe acute lower respiratory infection (ALRI).                                                                                                                                                                                                                      | Subclinical vitamin D deficiency & nonexclusive breastfeeding in four first months of life found to be significant risk factors for severe ALRI in Indian children.                                                                                                                                                                                                                                                                                            |
| El-Gamasy 2017   | Assess serum 25 (OH)D level in critically ill paediatric patients with AKI at PED of Tanta University Emergency Hospital (TUEH) within the first 24 hours of admission and evaluate its correlation with duration of hospital stay and mortality outcome.                                                                                                    | Vitamin D deficiency associated with higher incidence of sepsis and mortality.                                                                                                                                                                                                                                                                                                                                                                                 |

|                          |                                                                                                                                                                           |                                                                                                                                                                                                                                                                                                                                     |
|--------------------------|---------------------------------------------------------------------------------------------------------------------------------------------------------------------------|-------------------------------------------------------------------------------------------------------------------------------------------------------------------------------------------------------------------------------------------------------------------------------------------------------------------------------------|
| Banjeh 2009              | Determine if rickets and VDD predict the outcomes in very severe pneumonia (VSP).                                                                                         | In WHO-defined VSP, nutritional rickets was strongly associated with a reduced successful treatment outcome, and VDD was a significant and independent predictor of reduced circulating PMNs and persistent hypoxemia.                                                                                                              |
| Binks 2014               | Aimed to determine prevalence of vitamin D insufficiency among children hospitalised with ALRI in the Northern Territory.                                                 | Vitamin D insufficiency was observed in about one-third of these hospitalised children. Children hospitalised with an ALRI less likely to have vitamin D insufficiency compared with children hospitalised for other conditions (predominantly gastroenteritis).                                                                    |
| Roth 2009                | Test the hypothesis that vitamin D status is associated with the risk of ALRI in Canadian children (1 month to 2 years old)                                               | Among children aged 1 month to 2 years, vitamin D status not associated with ALRI requiring hospitalization                                                                                                                                                                                                                         |
| Hebbar 2014              | Prevalence of vitamin D insufficiency and relationship between vitamin D levels infection and innate immunity                                                             | High prevalence of vitamin D deficiency<br>Serum vitamin D levels - no correlation with illness severity score                                                                                                                                                                                                                      |
| Ebenezer 2016            | Determine vitamin D status and association with outcomes                                                                                                                  | Vitamin D deficiency common among pediatric patients<br>No association between vitamin D status and admission and mortality such as higher mortality and/or longer PICU stay<br>Deficiency associated with mechanical ventilation severity of illness, vasopressor need                                                             |
| Narang 2016              | Identify an effective nutritional agent that reduces the need for antibiotics, duration of pneumonia and length of hospitalization would be highly cost-beneficial.       | Severe vitamin D deficiency (<20 ng/ml), nonexclusive breastfeeding in the first six months of life, inadequate sun exposure found to be significant risk factors for ALRTI in Indian children.                                                                                                                                     |
| Alvarez 2016             | Study aimed to investigate relationship between vitamin D status and plasma markers of luthathione (GSH) and cysteine (Cys) redox and immunity in critically ill children | Vitamin D sufficiency was associated with more reduced plasma hCySS, indicative of lower oxidative stress, in critically ill children. Plasma GSH, GSSG, and glutamine, however, were lower in the vitamin D sufficient group. Vitamin D role in maintaining redox status during pediatric critical illness requires further study. |
| Cetinkaya 2015           | Evaluate the effect of vitamin D levels on early-onset sepsis (EOS) in term infants                                                                                       | Lower maternal and neonatal 25-OHD levels associated with EOS. Suggest that adequate vitamin D supplementation during pregnancy may be helpful to prevent EOS in term neonates.                                                                                                                                                     |
| Ahmed 2014               | Examine relationship between vitamin D status and hospitalization for ALRTI in Nigerian children.                                                                         | ALRTI not associated with vitamin D status, but associated with less exposure to sunlight. Exposure to sunlight & vitamin D supplementation contributed to vitamin D status in this population.                                                                                                                                     |
| Jat 2016                 | Evaluate Vitamin D levels and its correlation with severity and outcome of pneumonia in children.                                                                         | Majority (86.4%) of children were vitamin D deficient. Vitamin D levels were found different in cases and controls and were not related to severity and outcome of pneumonia.                                                                                                                                                       |
| Sankar 2017              | Evaluate association of severe vitamin D deficiency with clinically important outcomes in children with septic shock.                                                     | Prevalence of severe vitamin D deficiency is high in children with septic shock admitted to pediatric intensive care unit. Severe vitamin D deficiency at admission seems to be associated with lower rates of shock reversal at 24 hours of ICU stay.                                                                              |
| Cizmeci 2015             | Investigate if neonates with early-onset neonatal sepsis (EONS) had lower levels of vitamin D                                                                             | Cord-blood 25(OH) D levels of neonates with EONS significantly lower than that of the healthy controls, and a low level of cord-blood vitamin D was found to be associated with an increased risk of EONS. Further studies are warranted to confirm this association.                                                               |
| Khakshour 2015           | Clarify the association between vitamin D deficiency and acute respiratory infection in children below age 5 years.                                                       | The group of children with respiratory disorders, 9 (42.9%) exhibited vitamin D deficiency. No meaningful statistical relation vitamin D deficiency with acute respiratory infections (p>0.05)                                                                                                                                      |
| Korwutthikulrangsri 2015 | Determine vitamin D status in critically ill children and its relationship with adrenal function                                                                          | Higher prevalence of vitamin D deficiency in critically ill children in comparison to controls. Patients vitamin D deficiency had higher median (IQR) PRISM III score and higher proportion of mortality than those with serum 25-OHD of equal or more than 12 ng/mL.                                                               |
| Elmoneim 2016            | Association of the level of vitamin D on admission & length of stay in the PICU, or duration of mechanical ventilation.                                                   | High prevalence of vitamin D deficiency among PICU patients & significant association with increased LOS and need for mechanical ventilation. Not significant association with mortality rate.                                                                                                                                      |



|                   |                                                                                                                                                                                                                                                                         |                                                                                                                                                                                                                                                                                                                      |
|-------------------|-------------------------------------------------------------------------------------------------------------------------------------------------------------------------------------------------------------------------------------------------------------------------|----------------------------------------------------------------------------------------------------------------------------------------------------------------------------------------------------------------------------------------------------------------------------------------------------------------------|
| Dinlen 2016       | Determine the association between serum 25-hydroxy vitamin D [25(OH)D] levels and acute respiratory tract infections (ALRTI) in newborns                                                                                                                                | Lower blood 25(OH) D levels might be associated with increased risk of ALRTI in term newborn babies. Appropriate vitamin D supplementation during pregnancy and early childhood may enhance newborns' respiratory health.                                                                                            |
| Moreno-Solis 2015 | Examine prevalence of hypovitaminosis D in infants with acute bronchiolitis compared with control subjects and to evaluate the relationship between serum 25-hydroxyvitamin D (25(OH) D) and the severity of bronchiolitis.                                             | Prevalence of hypovitaminosis D is high in Spanish infants with bronchiolitis. The severity of acute bronchiolitis increases with a decline in serum 25 (OH) D level.                                                                                                                                                |
| Inamo 2011        | Relationship between serum vitamin D concentrations and severity of ALRI in hospitalized children in Japan.                                                                                                                                                             | Significantly more children with ALRI that required supplementary oxygen and ventilator management were vitamin D deficient. Findings suggest: immunomodulatory properties of vitamin D may influence the severity of ALRI.                                                                                          |
| Karatekin 2009    | Association of serum 25-hydroxy vitamin D concentrations in newborns with acute lower respiratory infection (ALRI) and without clinical signs of rickets, and their mothers                                                                                             | Newborns with subclinical vitamin D deficiency may have an increased risk of suffering from ALRI. Strong positive correlation between newborns' and mothers' 25(OH) D concentrations indicates that adequate vitamin D supplementation of mothers should be emphasized during pregnancy especially in winter months. |
| Roth 2010         | Investigate association between vitamin D status and ALRI                                                                                                                                                                                                               | Vitamin D status associated with ALRI in early childhood. Randomized trials needed to establish if interventions to improve vitamin D status could reduce burden of ALRI in early childhood.                                                                                                                         |
| Mathias 2017      | Determination of association of 25(OH)D with cathelicidin and DBP (D binding protein) in children with sepsis                                                                                                                                                           | No association between vitamin D and cathelicidin or DBP (D binding protein) levels                                                                                                                                                                                                                                  |
| Dhandai 2018      | Assess vitamin D deficiency as possible risk factor for late-onset sepsis in term and late preterm neonates                                                                                                                                                             | Vitamin D deficient neonates are at greater risk for late onset sepsis compared to those with sufficient vitamin D levels                                                                                                                                                                                            |
| Vo 2018           | Investigate the association between circulating 25-hydroxyvitamin D status upon admission and disease severity in infants hospitalized for bronchiolitis. Also, to determine if the association differs by the form of 25(OH)D (total, bioavailable or free 25 (OH) D). | Infants with total 25 (OH) D < 20 ng/ml had higher risk of intensive care and longer hospital length-of-stay                                                                                                                                                                                                         |
| Li 2018           | Assess vitamin D nutritional status of children of 3 days to 14 years and investigated the relationship between community-acquired pneumonia and serum 25(OH)D level                                                                                                    | Children with low serum 25 (OH) D levels may be at higher risk of receiving mechanical ventilation and presenting with multiple organ dysfunction. Vitamin D supplementation could be beneficial for the treatment and prevention of CAP                                                                             |

| <b>Additional Table 9 Assay used in each study to measure Vitamin D levels</b>                                         |                                                                                                                                                          |                                |
|------------------------------------------------------------------------------------------------------------------------|----------------------------------------------------------------------------------------------------------------------------------------------------------|--------------------------------|
| <b>Assay</b>                                                                                                           | <b>Paper</b>                                                                                                                                             | <b>Total Number of studies</b> |
| Radioimmunoassay                                                                                                       | Madden 2012; Inamo 2011; Karatekin 2009; Roth 2009; Roth 2010; Sakka 2014; Moreno-Solis 2015; Khashour 2015                                              | 8                              |
| Competitive binding enzyme linked immunoassay                                                                          | Basha 2014                                                                                                                                               | 1                              |
| Binding protein assay                                                                                                  | Onwuneme 2015 (2)                                                                                                                                        | 1                              |
| Liquid chromatography-mass spectrometry                                                                                | McNally 2012; Korwutthikulrangsri 2015; Binks 2014; Cetinkaya 2015; Cizmeci 2015; Asilioglu 2017; Onwuneme (1)                                           | 7                              |
| Chemiluminescence immunoassay or chemiluminescent tracer                                                               | Alonso 2015; Rey 2014; Sankar 2016; Shah 2016; Prasad 2015; Ahmed 2015; Lopez 2016; Alvarez 2016; Say 2017; Sankar 2017; Jat 2017; Mathias 2017; Li 2018 | 13                             |
| ELISA                                                                                                                  | Ponnarmeni 2016; Hebbar 2014; Elmoneim 2016; Narang 2016; Jia 2017; El-Gamasy 2017; Halwany 2017; Banajeh 2009; Badawi 2017                              | 9                              |
| ELFA (enzyme linked fluorescent assay)                                                                                 | Bustos 2014                                                                                                                                              | 1                              |
| Electrochemiluminescence Immunoassay (ECLIA)                                                                           | Dayal 2014, Ebenezer 2016, Garcia Soler 2017; Cayir 2014;                                                                                                | 4                              |
| Clinical Laboratory Improvement Amendments–approved Vitamin D assay (Elecys; Roche Diagnostics, Indianapolis, Indiana) | Hurwitz 2017                                                                                                                                             | 1                              |
| Commercial immunoassay lit (IRIA Diasorin UK)                                                                          | Wayse 2004, Ayulo 2014,                                                                                                                                  | 2                              |
| Immunoassay analyzer                                                                                                   | Rippel 2012                                                                                                                                              | 1                              |
| APPLIED 3200 Biosystem                                                                                                 | Dinlen 2016                                                                                                                                              | 1                              |
| Not reported                                                                                                           | Yaghmaie 2017; Dhandai 2018                                                                                                                              | 2                              |
| Abbott Architect assay (Abbott, Waukegan, Illinois)                                                                    | Vo 2018                                                                                                                                                  | 1                              |

**Additional Table 10 Funding and ethical approval of included studies**

| <b>Study</b>      | <b>Funding</b> | <b>Approval of study and ethics</b>                                                                                                                                                                                                                                                    |
|-------------------|----------------|----------------------------------------------------------------------------------------------------------------------------------------------------------------------------------------------------------------------------------------------------------------------------------------|
| Madden 2012       | Reported       | Children's Hospital Boston institutional review board. Informed consent obtained from family.                                                                                                                                                                                          |
| Lopez 2016        | Reported       | Approved by the Ethical Committee of Clinical Investigation of Galicia (CEIC ref 010/015) and all of the regional ethics committees of the participant centres informed consent forms were obtained from either a parent or legal guardian for each subject before study inclusion.    |
| Garcia-Soler 2017 | Not reported   | Study protocol approved by regional research ethics committee. Obtained informed consent from family of patients. Data recorded anonymously (encrypted electronic database).<br>Project adhered to the principles of Declaration of Helsinki and standards for good clinical practice. |
| McNally 2012      | Reported       | Research ethics board approval for vitamin D sub study obtained from 6 centers, representing 337 of the original 389 study participants.                                                                                                                                               |
| Rippel 2012       | Not Reported   | Approved by Ethics Committee of The Royal Children's Hospital Melbourne                                                                                                                                                                                                                |
| Alonso 2015       | Reported       | Regional Ethics Committee of the Principality of Asturias                                                                                                                                                                                                                              |
| Asilioglu 2017    | Not reported   | Approval of study by the Local Ethics Committee of Ondokuz Mayıs University (Samsun, Turkey).                                                                                                                                                                                          |
| Ayulo 2014        | Not reported   | Institutional Review Board: Montefiore Medical Centre                                                                                                                                                                                                                                  |
| Rey 2014          | Reported       | Hospital Ethics Committee                                                                                                                                                                                                                                                              |
| Shah 2016         | Reported       | Ethical approval obtained from Institutional ethics committee. Parents of children satisfying criteria gave written informed consent for participation of their child in the study.                                                                                                    |
| Ponnarmeni 2016   | Not reported   | The institution's ethics committee. Informed consent obtained                                                                                                                                                                                                                          |
| Onwuneme 2015 (1) | Reported       | Approval by ethics committees of: Children's University Hospital, Temple Street and Our Lady's Children's Hospital, Dublin, Ireland. Participants were informed and provided written consent before recruitment.                                                                       |
| Jia 2017          | Not reported   | Approved by Human Ethical Committee of Affiliated Hospital of Yan'an University, Yan'an. Informed consent was taken from mothers and/or parent of infants.                                                                                                                             |
| Halwany 2017      | Not reported   | Approval by the Medical Ethics Committee of the Faculty of Medicine, Alexandria University                                                                                                                                                                                             |
| Sankar 2016       | Not reported   | Institutional Ethics committee. Informed consent obtained                                                                                                                                                                                                                              |
| Say 2017          | Not reported   | Approval by the local Ethics Committee and informed parental consent was obtained for all infants.                                                                                                                                                                                     |
| Sakka 2014        | Not reported   | Not reported                                                                                                                                                                                                                                                                           |
| Onwuneme2015 (2)  | Reported       | Ethics Committee of National Maternity Hospital. Informed written consent obtained from parents before recruitment                                                                                                                                                                     |
| Dayal 2014        | Not reported   | Ethics Committee of the Institute. Informed consent obtained.                                                                                                                                                                                                                          |
| Bustos 2016       | Reported       | Comité Ético Científico del Servicio de Salud de Concepción                                                                                                                                                                                                                            |
| Hurwitz 2017      | Reported       | Informed consent obtained and study protocol approved by the Institutional Review Boards at the University of Tennessee, St Jude Research Hospital, and the Centers for Disease Control and Prevention.                                                                                |
| Çayır 2014        | Not reported   | Approval from the institutional ethics committee and consent from the parents of all children in the study.                                                                                                                                                                            |
| Badawi 2017       | Not reported   | Children's Cairo University institutional review board approved study. Informed consent obtained from parents                                                                                                                                                                          |
| Yaghmaie 2017     | Not reported   | Study carried out in accordance with the Declaration of Helsinki, and the ethics committee of the Tehran University of Medical Sciences approved the protocols of the study. Records of patients' were kept confidential. Patients' consent provided                                   |

|                          |              |                                                                                                                                                                                                                                                                         |
|--------------------------|--------------|-------------------------------------------------------------------------------------------------------------------------------------------------------------------------------------------------------------------------------------------------------------------------|
|                          |              | for blood sampling and vitamin D serum level was assessed from patients' files, so no invasive method or extra blood sampling was done.                                                                                                                                 |
| Basha 2014               | Not reported | Oral consent from the mothers.                                                                                                                                                                                                                                          |
| Prasad 2015              | Not reported | Institutional review board approved the protocol. Written informed consent obtained from parents or guardians.                                                                                                                                                          |
| Wayse 2004               | Reported     | Information not provided                                                                                                                                                                                                                                                |
| El-Gamasy 2017           | Not reported | Study approved from the Ethical Committee of the Faculty of Medicine, Tanta University. Informed verbal or written parental consents from all subjects involved in the study.                                                                                           |
| Banajeh 2009             | Reported     | Protocol approved and described in previous paper                                                                                                                                                                                                                       |
| Binks 2014               | Reported     | Testing performed after approval by the Human Research Ethics Committee of the Northern Territory Department of Health and Menzies School of Health Research                                                                                                            |
| Roth 2009                | Reported     | Caregiver of each participant provided written informed consent and completed a questionnaire. Study approved by the Human Research Ethics Board of the University of Alberta Health Sciences Faculties                                                                 |
| Hebbar 2014              | Reported     | Institutional Review Boards of Emory University and Children's Healthcare Atlanta. Informed consent obtained                                                                                                                                                            |
| Ebenezer 2016            | Reported     | Institutional Review Board (IRB), Informed consent from parents                                                                                                                                                                                                         |
| Narang 2016              | Not reported | Not reported                                                                                                                                                                                                                                                            |
| Alvarez 2016             | Reported     | Study approved by both the Emory University and Children's Healthcare of Atlanta Institutional Review Boards, and informed consent was obtained from patients' guardians prior to any study procedures                                                                  |
| Cetinkaya 2015           | Not reported | Study protocol approved by the local Ethics Committee. Informed parental consent was obtained for all infants                                                                                                                                                           |
| Ahmed 2014               | Not reported | Informed written or oral consent obtained from the parents, and the study was approved by the National Hospital Abuja Ethics Committee                                                                                                                                  |
| Jat 2016                 | Not reported | Ethics committee approval was taken before commencing the study. Parent's informed consent was taken before enrolling children into study.                                                                                                                              |
| Sankar 2017              | No funding   | Study approved by the institutional ethics committee.                                                                                                                                                                                                                   |
| Cizmeci 2015             | Reported     | Acquisition of cord-blood was approved by the local ethics committee of Fatih University Medical School.                                                                                                                                                                |
| Khakshour 2015           | Not reported | Obtained informed consent from parents, data collection done using demographic questionnaire and serum level of 25-dehydroxycalciferol was measured. Samples taken by a trained nurse at admission based on physician's orders.                                         |
| Korwutthikulrangsri 2015 | Not reported | Ramathibodi Hospital Ethics Committee. Written informed consent from legal guardians of all participants                                                                                                                                                                |
| Elmoneim 2016            | Reported     | MCH hospital Ethics Committee approved study protocol                                                                                                                                                                                                                   |
| Dinlen 2016              | Not reported | Study approved by the Local Ethics Committee. All parents fully informed about this investigation as well as its aim. Written consent was obtained from all parents.                                                                                                    |
| Moreno-Solis 2015        | Reported     | Written informed consent obtained from parents or legal guardian of all enrolled children. Protocol of study approved by the Ethics Committee before the beginning of this study.                                                                                       |
| Inamo 2011               | Not reported | Ethics Committee of Nihon University Nerima-Hikarigaoka Hospital. Informed consent obtained from the parents of all patients before inclusion in the study.                                                                                                             |
| Karatekin 2009           | Not reported | Study approved by the Institution's Ethics Committee, and informed consent was obtained from the study participants.                                                                                                                                                    |
| Roth 2010                | Reported     | Approved by The Johns Hopkins Bloomberg School of Public Health Institutional Review Board and the ethics committee of the Bangladesh Institute for Child Health at the Dhaka Shishu Hospital, Bangladesh. Signed permission prior to enrolment from parents/guardians. |

|              |              |                                                                                                                                                          |
|--------------|--------------|----------------------------------------------------------------------------------------------------------------------------------------------------------|
| Mathias 2017 | Reported     | The institution's Human Investigation Committee approved the study after a full board review and informed consent obtained                               |
| Dhandai 2018 | Not reported | The institute's ethics committee approved the study and informed written consent had been given by their parents or guardians                            |
| Vo 2018      | Reported     | The institutional review boards at all participating sites approved the protocol and informed consent obtained from the infants' parents/legal guardians |
| Li 2018      | Not reported | Protocols for the study and written consent approved by the ethics committee of the Capital Institute of Pediatrics at Beijing, China                    |

**Additional Table 11 Age groups of children in each study**

| <b>First author, date</b> | <b>Age group</b>                       |
|---------------------------|----------------------------------------|
| Wayse 2004                | <5 years                               |
| Karatekin 2009            | Neonates                               |
| Roth 2009                 | <2 years                               |
| Roth 2010                 | 1–18 months                            |
| Inamo 2011                | <4 years                               |
| Madden 2012               | <21 years                              |
| Rippel 2012               | 16.5 (3.1 to 75.2) months              |
| McNally 2012              | Newborn to 17 years                    |
| Ayulo 2014                | 1 to 21 years                          |
| Dayal 2014                | 3 months to 12 years                   |
| Hebbar 2014               | 0 to 18 years                          |
| Rey 2014                  | <16 years                              |
| Cetinkaya 2015            | >37 weeks                              |
| Onwuneme (1) 2015         | <12 years                              |
| Onwuneme (2) 2015         | <32 weeks gestation                    |
| Prasad 2015               | 2 months to 12 years                   |
| Alonso 2015               | 1 month to 13 years                    |
| Korwuthikulrangsri 2015   | 79 (61) cases; 92 (40) controls months |
| Cizmeci 2015              | Neonates                               |
| Shah 2016                 | 1 month to 15 years                    |
| Ponnarmeni 2016           | 1 to 12 years                          |
| Sankar 2016               | 1 month to 17 years                    |
| Bustos 2016               | >37 weeks and <15 years                |
| Ebenezer 2016             | <18 years                              |
| Elmoneim 2016             | <14 years                              |
| Narang 2016               | 2 months to 5 years                    |
| Dinlen 2016               | Neonates                               |
| Lopez 2016                | 0 to >48 months                        |
| Alvarez 2016              | 0 to 18 years                          |
| Garcia-Soler 2017         | 6 months to 17 years                   |
| Sankar 2017               | <17 years                              |
| Ahmed 2015                | 2 to 60 months                         |
| Cayir 2014                | 1 to 13 years                          |
| Say 2017                  | <37 weeks                              |
| Asilioglu 2017            | <=18 years                             |
| Basha 2014                | <5 years                               |
| Jia 2017                  | <1 year                                |
| Jat 2017                  | 1 month to 12 years                    |
| Yaghmaie 2017             | Age range not stated                   |
| El-Gamasy 2017            | 3 months to 12 years                   |
| Binks 2014                | <3 years                               |
| Halwany 2017              | >1 month to <= 5 years                 |
| Badawi 2017               | 1 month to 12 years                    |
| Moreno-Solis 2015         | 1 to 11 months                         |
| Sakka 2014                | <2 years                               |
| Hurwitz 2017              | <5 years                               |
| Banajeh 2009              | 2 to 59 months                         |
| Khakshour 2015            | < 5 years                              |
| Mathias 2017              | <= 18 years                            |
| Dhandai 2018              | Neonates                               |
| Vo 2018                   | < 12 months                            |
| Li 2018                   | 3 days to 14 years                     |

**Additional Table 12 Prevalence of vitamin D deficiency in each study of acute and critically ill children (sorted from highest to lowest)**

| Study                    | Prevalence of vitamin D deficiency (%) | Number of vitamin D deficient children | Total number of children |
|--------------------------|----------------------------------------|----------------------------------------|--------------------------|
| Wayse 2004               | 95.00                                  | 76                                     | 80                       |
| Sakka 2014               | 92.70                                  | 89                                     | 96                       |
| Karatekin 2009           | 92.00                                  | 23                                     | 25                       |
| Onwuneme2015 (2)         | 91.48                                  | 86                                     | 94                       |
| Say 2017                 | 87.00                                  | 87                                     | 100                      |
| Dinlen 2016              | 86.70                                  | 26                                     | 30                       |
| Cetinkaya 2015           | 84.00                                  | 42                                     | 50                       |
| Jat 2016                 | 84.00                                  | 42                                     | 50                       |
| Roth 2010                | 84.00                                  | 21                                     | 25                       |
| Prasad 2015              | 83.75                                  | 67                                     | 80                       |
| Jia 2017                 | 83.64                                  | 92                                     | 110                      |
| Shah 2016                | 83.11                                  | 128                                    | 154                      |
| Korwutthikulrangsri 2015 | 78.12                                  | 25                                     | 32                       |
| Sankar 2016              | 74.26                                  | 75                                     | 101                      |
| Sankar 2017              | 72.09                                  | 31                                     | 43                       |
| Cizmecci 2015            | 70.00                                  | 28                                     | 40                       |
| Mathias 2017             | 70.00                                  | 28                                     | 41                       |
| McNally 2012             | 69.02                                  | 225                                    | 326                      |
| Basha 2014               | 65.43                                  | 53                                     | 81                       |
| Yaghmaie 2017            | 64.63                                  | 53                                     | 82                       |
| Dhandai 2018             | 63.30                                  | 38                                     | 60                       |
| Hebbar 2014              | 60.66                                  | 37                                     | 61                       |
| Onwuneme 2015 (1)        | 59.16                                  | 71                                     | 120                      |
| Alvarez 2016             | 58.00                                  | 29                                     | 50                       |
| Cayir 2014               | 56.82                                  | 50                                     | 88                       |
| Elmoneim 2016            | 56.67                                  | 17                                     | 30                       |
| Narang 2016              | 56.00                                  | 28                                     | 50                       |
| Li 2018                  | 55.83                                  | 445                                    | 797                      |
| Ponnarmeni 2016          | 50.81                                  | 63                                     | 124                      |
| Asilioglu 2017           | 48.00                                  | 120                                    | 250                      |
| Badawi 2017              | 44.30                                  | 39                                     | 88                       |
| Garcia-Soler 2017        | 43.82                                  | 149                                    | 340                      |

|                   |       |     |       |
|-------------------|-------|-----|-------|
| Bustos 2016       | 43.30 | 39  | 90    |
| Ebenezer 2016     | 40.38 | 21  | 52    |
| Madden 2012       | 40.12 | 205 | 511   |
| Halwany 2017      | 37.25 | 38  | 102   |
| Banajeh 2009      | 36.71 | 29  | 79    |
| Rippel 2012       | 34.49 | 109 | 316   |
| El-Gamasy 2017    | 32.50 | 26  | 80    |
| Ahmed 2014        | 30.00 | 15  | 50    |
| Rey 2014          | 29.49 | 46  | 156   |
| Vo 2018           | 29.33 | 298 | 1,016 |
| Inamo 2011        | 28.50 | 8   | 28    |
| Dayal 2014        | 25.00 | 23  | 92    |
| Khakshour 2015    | 24.32 | 9   | 37    |
| Lopez 2016        | 24.20 | 84  | 347   |
| Alonso 2015       | 15.63 | 45  | 288   |
| Ayulo 2014        | 15.63 | 61  | 216   |
| Binks 2014        | 14.86 | 11  | 74    |
| Moreno-Solis 2015 | 13.33 | 9   | 48    |
| Hurwitz 2017      | 12.22 | 11  | 90    |
| Roth 2009         | 4.69  | 3   | 64    |



**Additional Table 13 Characteristics of studies used in the meta-analysis of prevalence**

| Study             | Total number of patients | Total number of vitamin D deficient patients | Country, setting    | Age range                              | Design          | Quality score (NOS) |
|-------------------|--------------------------|----------------------------------------------|---------------------|----------------------------------------|-----------------|---------------------|
| Vo 2018           | 1,016                    | 298                                          | USA, PICU           | < 12 months                            | cohort          | 8                   |
| Li 2018           | 797                      | 445                                          | China, PICU         | 3 days to 14 years                     | case-control    | 8                   |
| Madden 2012       | 511                      | 205                                          | Boston US, PICU     | < 21 years                             | cohort          | 8                   |
| Lopez 2016        | 347                      | 84                                           | Spain, hospitalised | 0 to >48 months                        | cohort          | 8                   |
| Garcia-Soler 2017 | 340                      | 149                                          | Spain, PICU         | 6 months to 17 years                   | cohort          | 7                   |
| McNally 2012      | 326                      | 225                                          | Canada, PICU        | newborn to 17 years of age             | cohort          | 7                   |
| Rippel 2012       | 316                      | 109                                          | Australia, PICU     | 16.5 (3.1–75.2) months                 | cohort          | 8                   |
| Alonso 2015       | 288                      | 45                                           | Spain, PICU         | 1 month to 13 years                    | cross sectional | 5                   |
| Asilioglu 2017    | 250                      | 120                                          | Turkey, PICUs       | <= 18 years                            | cohort          | 6                   |
| Ayulo 2014        | 216                      | 61                                           | Spain, PICU         | 1 month to 13 years                    | cross sectional | 5                   |
| Rey 2014          | 156                      | 46                                           | Spain, PICU         | <16 years                              | cohort          | 7                   |
| Shah 2016         | 154                      | 128                                          | India, PICU         | 1 month-15 years                       | cohort          | 6                   |
| Ponnarmeni 2016   | 124                      | 63                                           | India, PICU         | aged 1–12 years                        | cohort          | 6                   |
| Onwuneme 2015 (1) | 120                      | 71                                           | Ireland, PICU       | <12 years old                          | cohort          | 8                   |
| Jia 2017          | 110                      | 92                                           | China, PICU         | infants <1 years old                   | case-control    | 7                   |
| Halwany 2017      | 102                      | 38                                           | Alexandria, PICU    | >1 month to ≤ 5 years                  | cohort          | 6                   |
| Sankar 2016       | 101                      | 75                                           | India, PICU         | 1 month to 17 years                    | cohort          | 8                   |
| Say 2017          | 100                      | 87                                           | Turkey, NICU        | gestational age <37 weeks              | case-control    | 6                   |
| Sakka 2014        | 96                       | 89                                           | Egypt, hospitalized | infants (<2 years old)                 | case-control    | 8                   |
| Onwuneme 2015 (2) | 94                       | 86                                           | Ireland, NICU       | preterm infants at <32 weeks gestation | cohort          | 8                   |
| Dayal 2014        | 92                       | 23                                           | India, PICU         | 3 months to 12 years                   | cohort          | 6                   |
| Bustos 2016       | 90                       | 39                                           | Chile, PICU         | >37 weeks and <15 years                | cohort          | 7                   |
| Hurwitz 2017      | 90                       | 11                                           | USA, hospitalised   | <5 years old                           | cohort          | 6                   |
| Cayir 2014        | 88                       | 50                                           | Turkey, PICU        | 1 to 13 years                          | case-control    | 7                   |
| Badawi 2017       | 88                       | 39                                           | Cairo, Egypt PICU   | 1 month to 12 years                    | cohort          | 7                   |
| Yaghmaie 2017     | 82                       | 53                                           | Iran, PICU          | children undefined                     | cross sectional | 4                   |
| Basha 2014        | 81                       | 53                                           | Cairo Egypt, PICU   | <5 years old                           | case-control    | 7                   |
| Prasad 2015       | 80                       | 67                                           | India, PICU         | 2 months-12 years                      | cohort          | 7                   |
| Wayse 2004        | 80                       | 76                                           | Indapur India, PICU | <5 years                               | case-control    | 6                   |
| El-Gamasy 2017    | 80                       | 26                                           | Egypt, PICU         | 3 months to 12 years                   | cohort          | 7                   |
| Banajeh 2009      | 79                       | 29                                           | Iran, hospitalised  | aged 2–59 months                       | cohort          | 7                   |
| Binks 2014        | 74                       | 11                                           | Australia, PICU     | <3 years old                           | cross sectional | 6                   |
| Roth 2009         | 64                       | 3                                            | Canada, PICU        | aged 1-25 months                       | case-control    | 7                   |
| Hebbar 2014       | 61                       | 37                                           | Atlanta, PICU       | 0 to 18 years                          | cohort          | 6                   |
| Dhandai 2018      | 60                       | 38                                           | India, NICU         | neonates                               | cohort          | 7                   |

|                         |    |    |                       |                                |                 |   |
|-------------------------|----|----|-----------------------|--------------------------------|-----------------|---|
| Ebenezer 2016           | 52 | 21 | India, PICU           | <18 years                      | cohort          | 6 |
| Narang 2016             | 50 | 28 | Punjab, India, PICU   | 2 months to 5 years            | case-control    | 6 |
| Alvarez 2016            | 50 | 29 | Atlanta, PICU         | 0 to 18 years                  | cross sectional | 6 |
| Cetinkaya 2015          | 50 | 42 | Instabul/Turkey, NICU | neonates                       | case-control    | 6 |
| Ahmed 2014              | 50 | 15 | Nigeria, PICU         | 2-60 months                    | case-control    | 8 |
| Jat 2016                | 50 | 42 | India, PICU           | 1 month to 12 years            | case-control    | 8 |
| Sankar 2017             | 43 | 31 | India, PICU           | <=17 years                     | cohort          | 8 |
| Mathias 2017            | 41 | 28 | USA, PICU             | <= 18 years                    | cohort          | 6 |
| Cizmeci 2015            | 40 | 28 | Instabul/Turkey, NICU | neonates                       | case-control    | 7 |
| Khakshour 2015          | 37 | 9  | Iran, hospitalized    | <5 years                       | case-control    | 5 |
| Korwutthikulrangri 2015 | 32 | 25 | Bangkok, PICU         | months not more specific range | cohort          | 7 |
| Elmoneim 2016           | 30 | 17 | Saudi Arabia, PICU    | <14 years                      | cohort          | 7 |
| Dinlen 2016             | 30 | 26 | Ankara Turkey, NICU   | neonates                       | case-control    | 6 |
| Moreno-Solis 2015       | 48 | 9  | Spain, PICU           | infants 1-11 months            | case-control    | 6 |
| Inamo 2011              | 28 | 8  | Tokyo Japan, PICU     | 1-48 months                    | cohort          | 6 |
| Karatekin 2009          | 25 | 23 | Istanbul Turkey, NICU | neonates                       | case-control    | 6 |
| Roth 2010               | 25 | 21 | Bangladesh            | 1-18 months                    | case-control    | 8 |

Studies arranged from largest to smallest total sample size. NOS = Newcastle Ottawa Score

**Additional Table 14 Sensitivity analyses for prevalence of vitamin D deficiency in acute and critically ill children**

| Patient category                                                                | Number of studies<br>(Total number of<br>individuals; number<br>of vitamin D<br>deficient<br>individuals) | Pooled<br>proportion<br>% (95% CI) | 95% PI    | Pooled proportion<br>% (95% CI) | Heterogeneity<br>(I <sup>2</sup> )<br>% (95% CI) | Q value, d.f.<br>p-value<br>for heterogeneity | Median % (IQR)<br>of vitamin D<br>deficiency |
|---------------------------------------------------------------------------------|-----------------------------------------------------------------------------------------------------------|------------------------------------|-----------|---------------------------------|--------------------------------------------------|-----------------------------------------------|----------------------------------------------|
|                                                                                 |                                                                                                           | Random effects model               |           | Fixed effects model             |                                                  |                                               |                                              |
| Acute and critically ill children, excluding studies that used other thresholds | 40 (6,543; 3,000)                                                                                         | 53.0 (46.4-59.5)                   | 17.7-85.5 | 45.1 (43.8-46.5)                | 95.5 (94.5-96.2)                                 | 859.8, 39, < 0.0001                           | 55.9 (33.4-55.9)                             |
| Sample size<br>>= 82 (large)                                                    | 26 (6,094; 2,731)                                                                                         | 51.5 (43.6-59.4)                   | 16.5-85.2 | 44.0 (42.6-45.3)                | 96.8 (96.0-97.4)                                 | 773.1, 25, < 0.0001                           | 46.2 (30.7-67.9)                             |
| Sample size < 82<br>(small)                                                     | 26 (1,340; 742)                                                                                           | 58.2 (47.5-68.2)                   | 13.2-92.8 | 54.8 (51.7-58.0)                | 90.9 (87.9-93.2)                                 | 275.4, 25, < 0.0001                           | 62.0 (33.6-82.3)                             |
| Cohort studies                                                                  | 30 (5,119; 2,197)                                                                                         | 49.6 (42.7-56.4)                   | 17.6-81.9 | 42.1 (40.7-43.6)                | 94.9 (93.6-95.9)                                 | 567.0, 29, < 0.0001                           | 44.1 (33.0-67.1)                             |
| Case-control                                                                    | 18 (1,821; 1,138)                                                                                         | 68.1 (56.5-77.8)                   | 19.3-95.0 | 60.8 (58.2-63.3)                | 93.0 (90.4-94.9)                                 | 243.9, 17, 0.0001                             | 76.8 (55.9-86.0)                             |
| Cross sectional                                                                 | 4 (494; 138)                                                                                              | 34.8 (12.8-66.0)                   | 0.10-99.6 | 30.3 (25.9-35.2)                | 96.7 (94.0-98.2)                                 | 90.4, 3, < 0.0001                             | 36.8 (15.4-59.7)                             |
| Studies from India                                                              | 11 (886; 592)                                                                                             | 68.9 (54.9-80.1)                   | 18.3-95.6 | 64.0 (60.4-67.5)                | 96.7 (94.0-98.2)                                 | 140.2, 10, < 0.0001                           | 72.1 (53.4-83.4)                             |
| Studies from Turkey                                                             | 7 (583; 376)                                                                                              | 76.3 (60.9-87.0)                   | 20.9-97.5 | 61.0 (56.6-65.2)                | 91.1 (84.2-95.0)                                 | 67.5, 6, < 0.0001                             | 84 (63.4-86.8)                               |
| Studies that only recruited neonates                                            | 7 (399; 330)                                                                                              | 83.0 (73.1-90.0)                   | 42.4-97.0 | 80.7 (76.1-84.5)                | 76.6 (51.0-88.9)                                 | 25.7, 6, 0.0003                               | 86.7 (77.0-89.2)                             |
| Studies with children of all other ages except neonates                         | 45 (7,035; 3,143)                                                                                         | 49.7 (43.5-55.8)                   | 16.1-83.5 | 44.2 (43.0-45.5)                | 95.2 (94.3-96.0)                                 | 919.9, 44, < 0.0001                           | 48.0 (29.5-68.3)                             |

CI = confidence intervals; I<sup>2</sup> = heterogeneity; df = degrees of freedom. Vitamin D deficiency defined in our study as <50 nmol/L (20 ng/mL)

I<sup>2</sup> statistic used to estimate heterogeneity between pooled studies: I<sup>2</sup> >= 75% was considered as high heterogeneity, PI= Prediction interval; IQR = interquartile range: Lower (Q1) to Upper (Q3) quartile

**Additional Table 15 Multivariate meta-regression model for prevalence**

| Predictors                                                                                       | k  | b-coefficient | se    | t-value | p-value | ci.lb  | ci.ub  | F-value | I <sup>2</sup> (%) | R <sup>2</sup> (%) | QE                |
|--------------------------------------------------------------------------------------------------|----|---------------|-------|---------|---------|--------|--------|---------|--------------------|--------------------|-------------------|
| Full model: year + clinical setting + quality score + design + country group + total sample size | 52 |               |       |         |         |        |        | 4.57    | 95.7               | 32.9               | 702.6, p < 0.0001 |
| year                                                                                             |    | -0.015        | 0.058 | -0.256  | 0.799   | -0.132 | 0.103  |         |                    |                    |                   |
| total study sample size                                                                          |    | -0.001        | 0.001 | -0.731  | 0.469   | -0.002 | 0.001  |         |                    |                    |                   |
| country group (group 1 or 2 versus group 3)                                                      |    | 1.009         | 0.356 | 2.831   | 0.007   | 0.291  | 1.726  |         |                    |                    |                   |
| clinical setting (NICU versus PICU)                                                              |    | -1.573        | 0.465 | -3.384  | 0.002   | -2.510 | -0.637 |         |                    |                    |                   |
| design group (cohort vs other i.e. case-control or cross sectional)                              |    | 0.482         | 0.324 | 1.488   | 0.144   | -0.170 | 1.135  |         |                    |                    |                   |
| quality score                                                                                    |    | 0.296         | 0.170 | 1.744   | 0.088   | -0.046 | 0.637  |         |                    |                    |                   |

k = number of outcomes included in the model fitting; se = standard errors of the coefficients; ci.lb = lower bound of the confidence intervals for the coefficients; ci.ub = upper bound of the confidence intervals for the coefficients; QE = test statistic for the test of (residual) heterogeneity; I<sup>2</sup> = residual heterogeneity / unaccounted variability; R<sup>2</sup> (amount of heterogeneity accounted for; PICU = pediatric intensive care units, NICU = neonatal intensive care units

**Additional Table 16 Characteristics of studies included in the meta-analysis for prevalence in individuals with sepsis**

| Study                    | Total number of patients with sepsis | Total number of vitamin D deficient patients with sepsis | Country, setting                      | Age                                    | Design       | Quality score (NOS) |
|--------------------------|--------------------------------------|----------------------------------------------------------|---------------------------------------|----------------------------------------|--------------|---------------------|
| Shah 2016                | 160                                  | 135                                                      | India, PICU                           | 1 month to 16 years                    | cohort       | 6                   |
| Asilioglu 2017           | 120                                  | 20                                                       | Turkey, PICU                          | 1 month to ≤18 years                   | cohort       | 7                   |
| Say 2017                 | 100                                  | 87                                                       | Turkey, NICU                          | preterm infants at <37 weeks gestation | case-control | 6                   |
| Dhandai 2018             | 60                                   | 38                                                       | India, NICU                           | neonates                               | cohort       | 7                   |
| Ponnarmeni 2016          | 62                                   | 32                                                       | India, PICU                           | 1 to 12 years                          | cohort       | 6                   |
| McNally 2012             | 48                                   | 33                                                       | Canada, PICU                          | newborn to 17 years                    | cohort       | 7                   |
| Onwuneme 2015 (2)        | 46                                   | 32                                                       | Ireland, NICU                         | preterm infants at <32 weeks gestation | cohort       | 8                   |
| El-Gamasy 2017           | 46                                   | 20                                                       | Egypt, pediatric emergency department | 3 months to 12 years                   | cohort       | 7                   |
| Sankar 2017              | 43                                   | 31                                                       | India, PICU                           | <=17 years                             | cohort       | 8                   |
| Mathias 2017             | 41                                   | 28                                                       | USA, PICU                             | <=18 years                             | cohort       | 6                   |
| Cizmeci 2015             | 40                                   | 28                                                       | Turkey, NICU                          | neonates                               | case-control | 7                   |
| Onwuneme 2015 (1)        | 35                                   | 32                                                       | Ireland, PICU                         | <12 years old                          | cohort       | 8                   |
| Hebbar 2014              | 30                                   | 17                                                       | Atlanta, PICU                         | 0 to 18 years                          | cohort       | 6                   |
| Ebenezer 2016            | 16                                   | 8                                                        | India, PICU                           | <18 years                              | cohort       | 6                   |
| Korwutthikulrangsri 2015 | 12                                   | 4                                                        | Bangkok, PICU                         | moths (<8/9)                           | cohort       | 7                   |
| Prasad 2015              | 11                                   | 9                                                        | India, PICU                           | 2 months to 12 years                   | cohort       | 7                   |
| Bustos 2016              | 10                                   | 7                                                        | Chile, PICU                           | >37 weeks and < than 15 years          | cohort       | 7                   |
| Dayal 2014               | 9                                    | 4                                                        | India, tertiary care hospital         | 3 months to 12 years                   | cohort       | 6                   |

| <b>Additional Table 17 Sensitivity analyses for prevalence of vitamin D deficiency in acute and critically ill children with sepsis</b> |                                                                                            |                               |           |                               |                                          |                                         |                                        |
|-----------------------------------------------------------------------------------------------------------------------------------------|--------------------------------------------------------------------------------------------|-------------------------------|-----------|-------------------------------|------------------------------------------|-----------------------------------------|----------------------------------------|
| Patient category                                                                                                                        | Number of studies (Total number of individuals; number of vitamin D deficient individuals) | Pooled proportion (%; 95% CI) | 95% PI    | Pooled proportion (%; 95% CI) | Heterogeneity (I <sup>2</sup> %; 95% CI) | Q value, d.f. p-value for heterogeneity | Median % (IQR) of vitamin D deficiency |
|                                                                                                                                         |                                                                                            | Random effects                |           | Fixed effects                 |                                          |                                         |                                        |
| Excluding studies that used other thresholds                                                                                            | 14 (654; 395)                                                                              | 62.0 (47.3-74.7)              | 13.3-94.5 | 60.4 (56.0-64.7)              | 89.7 (84.5-93.2)                         | 126.5, 13, < 0.0001                     | 65.8 (50.4-70.0)                       |
| Sample size >= 42 (large)                                                                                                               | 9 (685; 428)                                                                               | 63.2 (44.6-78.5)              | 9.4-96.6  | 62.5 (58.2-66.6)              | 94.3 (91.1-96.3)                         | 139.2, 8 < 0.0001                       | 68.8 (51.6-72.1)                       |
| Sample size < 42 (small)                                                                                                                | 9 (204; 137)                                                                               | 64.7 (52.5-75.3)              | 29.5-89.0 | 64.7 (57.4-71.4)              | 57.9 (11.8-79.9)                         | 19.0, 8, 0.0148                         | 68.3 (50.0-70.0)                       |
| Cohort studies                                                                                                                          | 16 (749; 450)                                                                              | 61.4 (48.6-72.8)              | 15.5-93.2 | 60.0 (55.9-63.9)              | 88.8 (83.5-92.4)                         | 134.2, 15, < 0.0001                     | 65.8 (48.6-70.5)                       |
| Case-control                                                                                                                            | 2 (140; 115)                                                                               | 80.0 (58.8-91.8)              | NA        | 81.0 (73.3-86.9)              | 81.3 (20.5-95.6)                         | 5.35, 1, 0.0207                         | 78.5 (74.2-82.8)                       |
| Studies from India                                                                                                                      | 7 (361; 257)                                                                               | 66.0 (51.4-78.1)              | 21.3-93.3 | 69.2 (63.9-74.1)              | 81.1 (61.8-90.6)                         | 31.7, 6 < 0.0001                        | 63.3 (50.8-77.0)                       |
| Studies from Turkey                                                                                                                     | 3 (260; 135)                                                                               | 59.2 (13.6-93.1)              | 0.00-100  | 51.2 (43.2-59.3)              | 97.8 (95.8- 98.8)                        | 90.0, 2, < 0.0001                       | 70.0 (43.3-78.5)                       |
| Studies that only included neonates                                                                                                     | 4 (246; 185)                                                                               | 73.7 (60.3-83.8)              | 15.9-97.7 | 73.5 (67.3-78.9)              | 76.0 (34.1-91.3)                         | 12.5, 3, 0.0058                         | 69.8 (68.0-74.3)                       |
| Studies that included children of all other ages except neonates                                                                        | 14 (643; 380)                                                                              | 60.7 (45.5-74.0)              | 11.8-94.7 | 58.7 (54.2-63.0)              | 90.1 (85.2-93.4)                         | 131.8, 13 < 0.0001                      | 62.5 (45.8-71.6)                       |

CI = confidence intervals; I<sup>2</sup> = heterogeneity; df = degrees of freedom. Vitamin D deficiency defined in our study as <50 nmol/L (20 ng/mL). I<sup>2</sup> statistic used to estimate heterogeneity between pooled studies: I<sup>2</sup> >= 75% was considered as high heterogeneity; PI= Prediction interval; IQR = interquartile range: Lower (Q1) to Upper (Q3) quartile; NA= Not available

**Additional Table 18 Sensitivity analyses for mortality. Pooled odds ratios for risk of mortality in deficient versus not deficient children**

| Patient category                             | Number of studies<br>(Total number of individuals) | Pooled OR (95% CI)<br>Vitamin D deficient/ Vitamin D non-deficient<br>p-value |                                     | Heterogeneity (I <sup>2</sup> ) %<br>(95% CI) | Q value,<br>d.f.<br>p-value for<br>heterogeneity | Eggers<br>p-value                                                      |
|----------------------------------------------|----------------------------------------------------|-------------------------------------------------------------------------------|-------------------------------------|-----------------------------------------------|--------------------------------------------------|------------------------------------------------------------------------|
|                                              |                                                    | Random effects                                                                | Fixed effects                       |                                               |                                                  |                                                                        |
| Excluding studies that used other thresholds | 14<br>(2,030)                                      | 1.59 (1.05-2.41)<br>p-value = 0.028                                           | 1.52 (1.08-2.13)<br>p-value = 0.016 | 24.3 (0.0-59.9)                               | 17.18,<br>13,<br>0.1910                          | p-value = 0.120                                                        |
| Studies from India                           | 7<br>(646)                                         | 1.08 (0.70-1.69)<br>p-value = 0.710                                           | 1.08 (0.70-1.69)<br>p-value = 0.710 | 0.0 (0.0-62.4)                                | 4.56,<br>6,<br>0.589                             | Number of studies too small to test for small study effects (k.min=10) |

CI = Confidence Intervals; I<sup>2</sup> = I squared statistic used to estimate heterogeneity (inconsistency); df = degrees of freedom, results reported in 1 decimal place; OR= odds ratio. Vitamin D deficiency defined as < 50 nmol/L or 20 ng/ml. We used the I<sup>2</sup> statistic to estimate heterogeneity between pooled studies: I<sup>2</sup> >= 75% was considered as high heterogeneity.

## Additional Figures

**Additional Figure 1** Funnel plot of studies of prevalence of vitamin D deficiency in acute and critically ill children. Horizontal axis shows logit transformed proportion and the standard error of the logit transformed proportion is plotted on the vertical axis. Each dot represents an individual study and the vertical line represents the pooled proportion from a random-effects meta-analysis. The diagonal lines represent pseudo 95% confidence limits ( $p=0.01$ , Egger's test).

Plot A shows the funnel plot before trim and fill method was applied and B after. Solid circles in plot B represent original data and open circles represent imputed filled studies (11 studies added) on the left-hand side of the funnel plot.

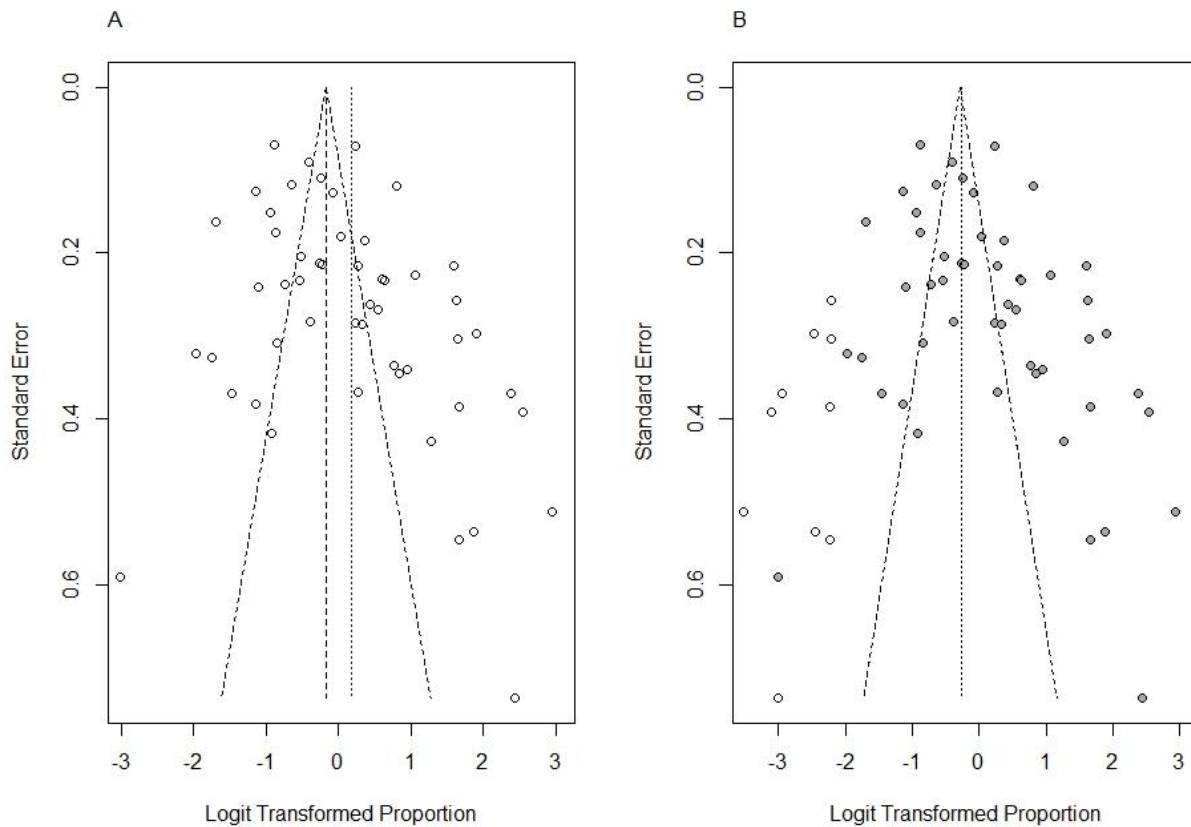



**Additional Figure 2. Pooled prevalence estimate for vitamin D deficiency in acute and critically ill children (by country group).** Forest plot shows results from the random effects model. Diamonds represent pooled proportion of vitamin D deficiency for the countries in each subgroup (group 1, group2, group 3). The diamond at the bottom shows the overall pooled estimate of all the 52 studies. Each square shows the prevalence estimate of each study and the horizontal line across each square represents the 95% confidence interval (CI) of the prevalence estimate.

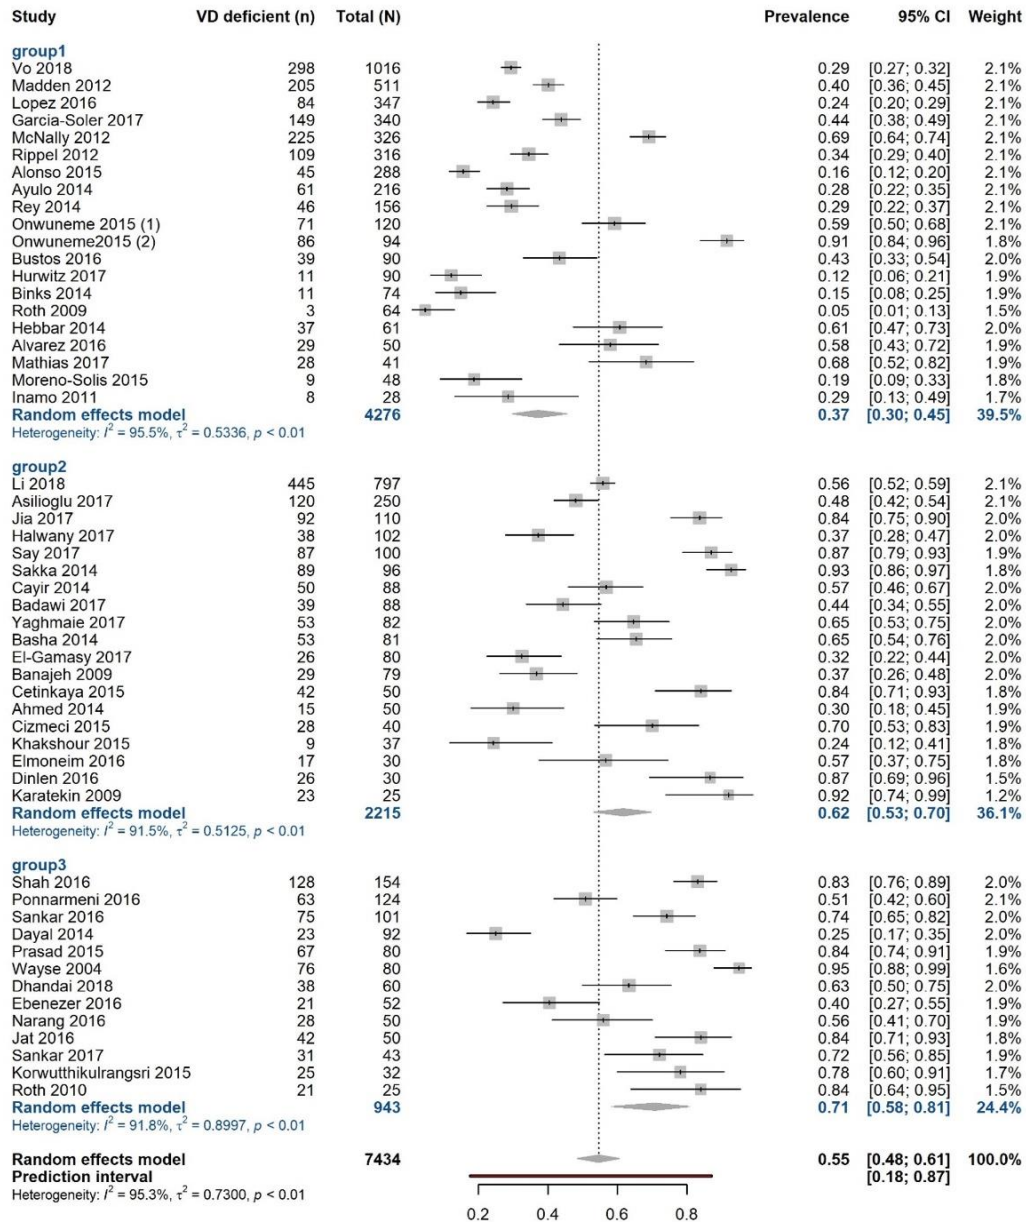

**Additional Figure 3. Pooled prevalence estimates for vitamin D deficiency in acute and critically ill children (neonates versus all other age groups).** Forest plot shows results from the random effects model. Diamonds represent pooled proportion of vitamin D deficiency for the studies in neonates and all other age groups. The diamond at the bottom shows the overall pooled estimate of all the 52 studies. Each square shows the prevalence estimate of each study and the horizontal line across each square represents the 95% confidence interval (CI) of the prevalence estimate.

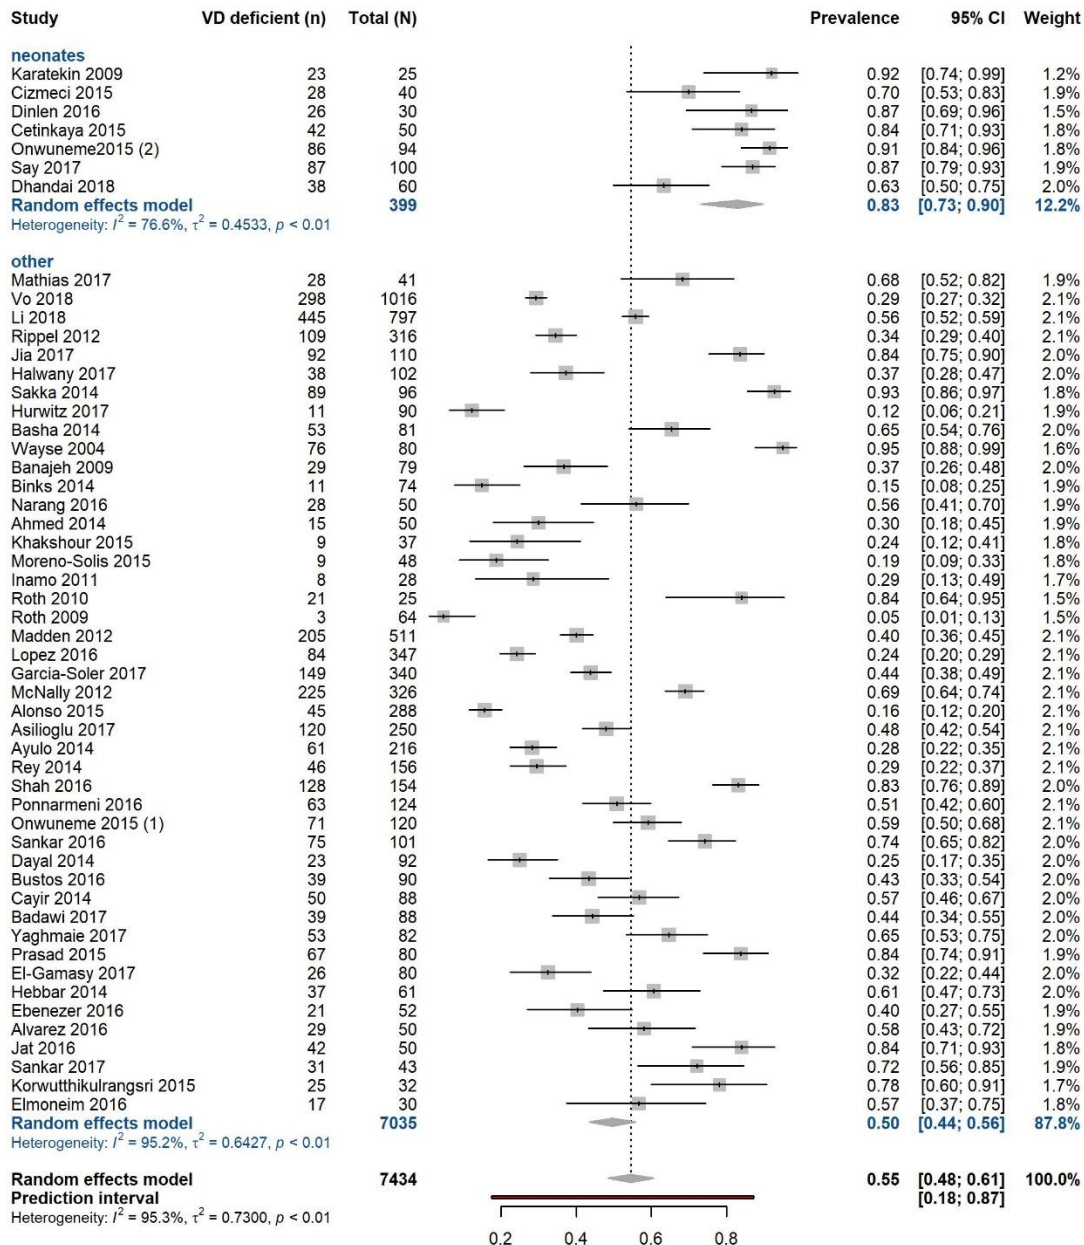

**Additional Figure 4 Bubble plots of univariate meta-regressions.** Each study is represented by a circle. Predictor variables: A study design, B year of publication, C quality score and D total children are plotted on the x-axis with the effect measure logit transformed proportion shown on the vertical (y-axis).

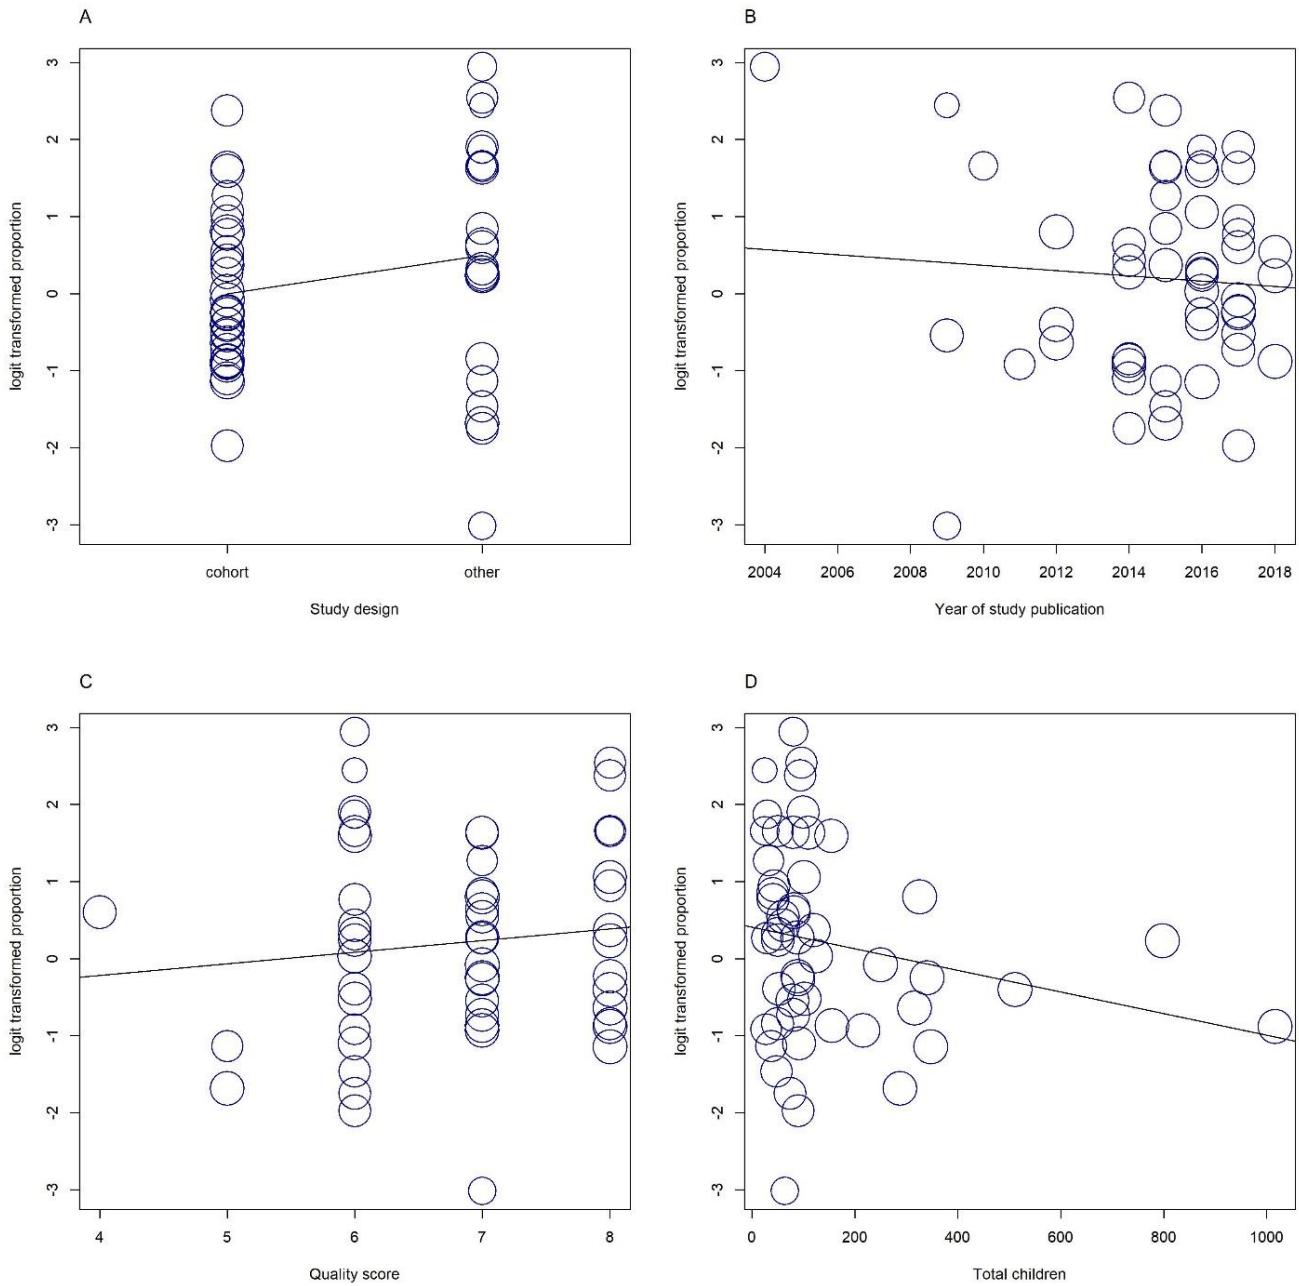

**Additional Figure 5 Funnel plot for prevalence of vitamin D deficiency in acute and critically ill children with sepsis.** Horizontal axis shows logit transformed proportion and the standard error of the logit transformed proportion is plotted on the vertical axis. Each dot represents an individual study and the vertical line represents the pooled proportion from a random-effects meta-analysis. The diagonal lines represent pseudo 95% confidence limits ( $p=0.81$ , Egger's test).

*Funnel Plot with pseudo 95% Confidence Intervals*

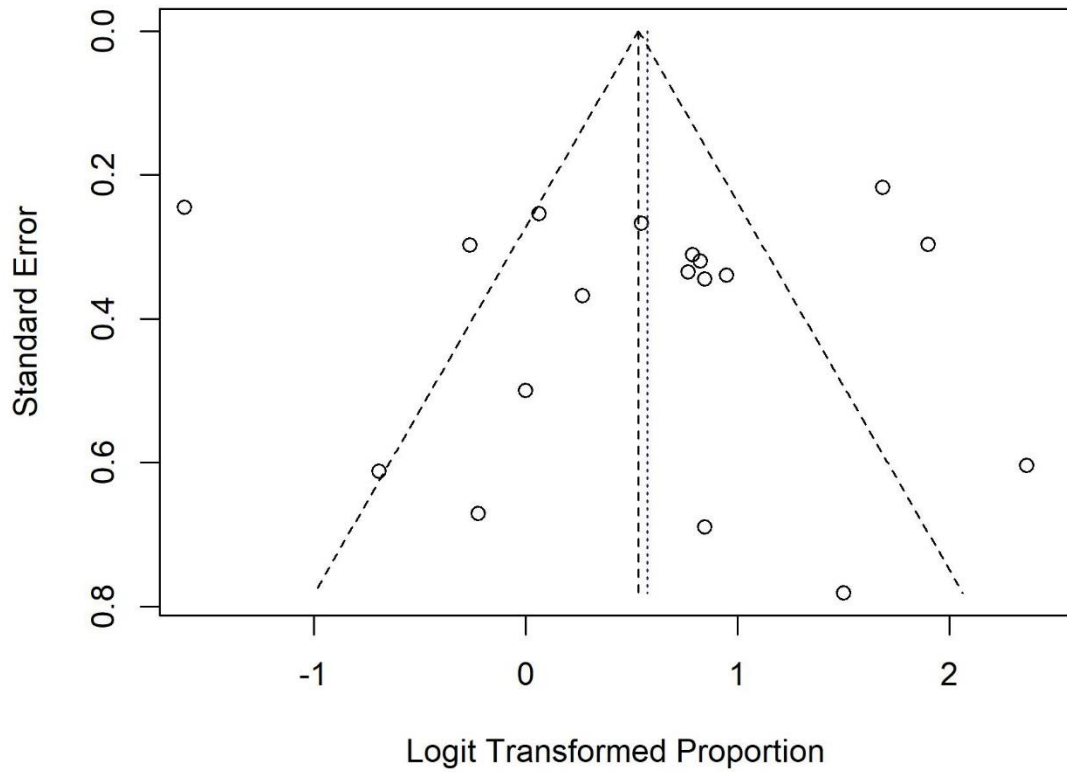

**Additional Figure 6 Pooled prevalence estimate for vitamin D deficiency in acute and critically ill children with sepsis (subgroup analysis by study design).** Forest plot shows results from the random effects model. Diamonds represent the pooled proportion of vitamin D deficiency for the studies in each subgroup (case-control and cohort). The diamond at the bottom shows the overall pooled estimate of all the 18 studies. Each square shows the prevalence estimate of each study and the horizontal line across each square represents the 95% confidence interval (CI) of the prevalence estimate.

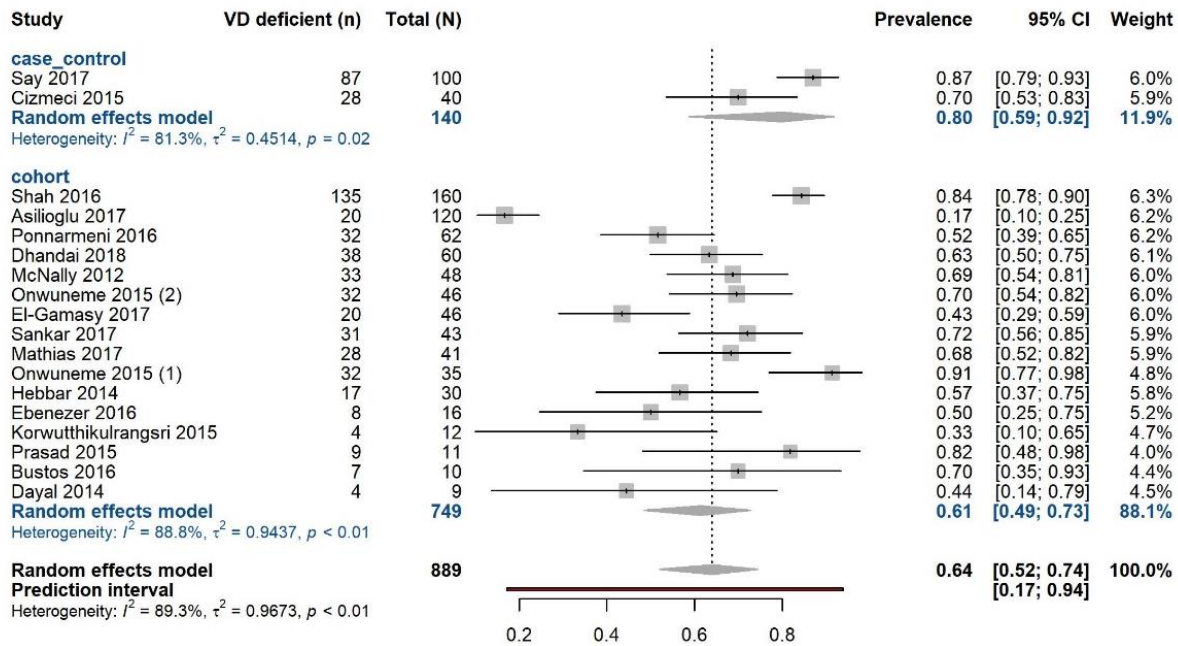

**Additional Figure 7 Funnel plot of risk of mortality in vitamin D deficient versus vitamin D non-deficient acute and critically ill children.** Horizontal axis shows logit transformed odds ratio and the standard error of the log odds ratio is plotted on the vertical axis. Each dot represents an individual study and the vertical line represents the overall pooled odds ratio from random-effects meta-analysis. The diagonal lines represent pseudo 95% confidence limits ( $p=0.084$ , Egger's test).

*Funnel Plot with pseudo 95% Confidence Intervals*

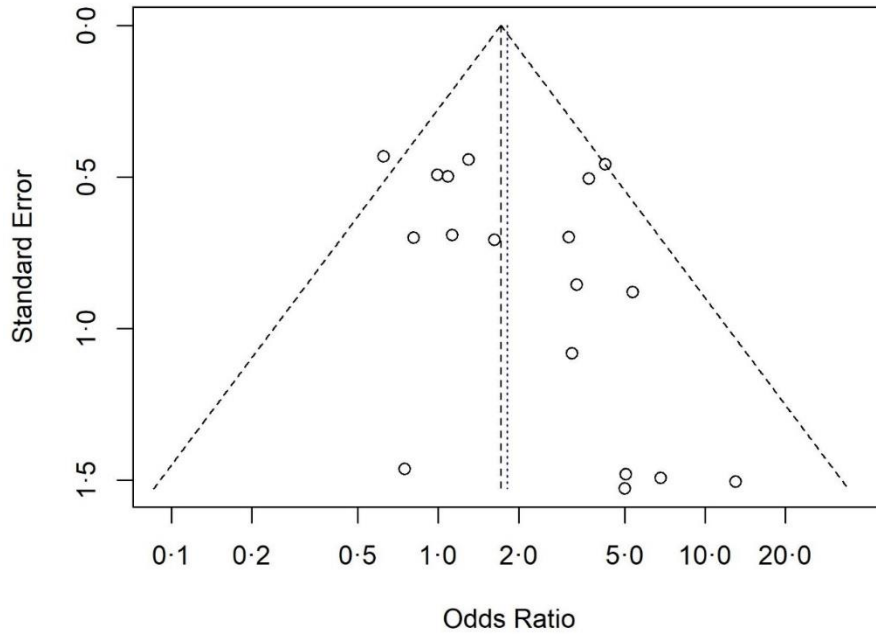

**Additional Figure 8 Pooled odds ratio (OR) and 95% CI for risk of mortality in vitamin D deficient versus vitamin D non-deficient acute and critically ill children (fixed effects model).** Diamond represents the overall odds ratio (with corresponding 95% Confidence Interval). Each square shows the odds ratio of each study and the horizontal line across each square represents the 95% confidence interval (CI) of the estimate.

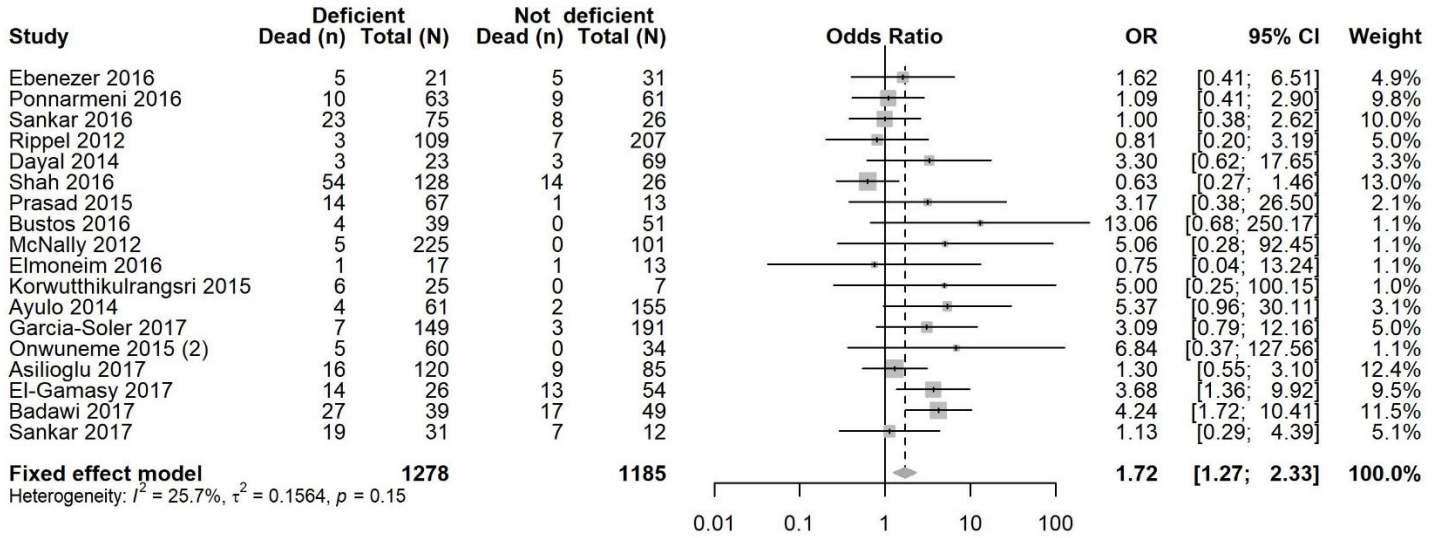

Supplement: bmjopen-2018-027666supp001.pdf [file bmjopen-2018-027666supp001.pdf]
